# Supplementary material for: Synthesis and Preliminary Biological Evaluation of 1,3,5-Triazine Amino Acid Derivatives to Study Their MAO Inhibitors
Source: MDPI journal article supplement (doi:10.3390/molecules200915976), 2015-09-02
Supplement: s1 [file s1]

## Supplementary Materials

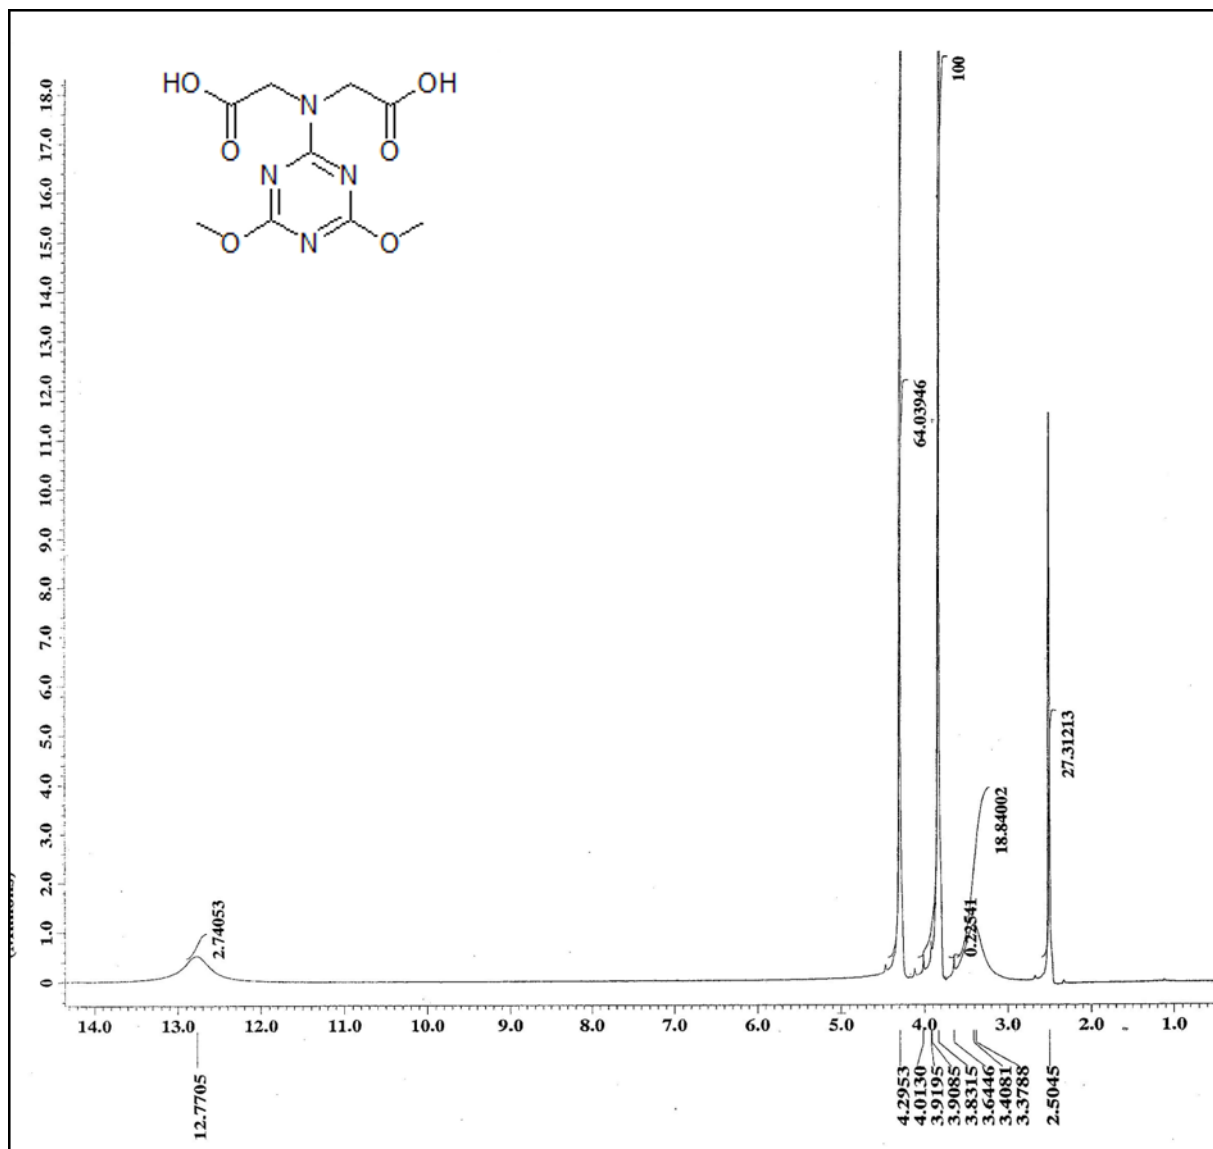

**Figure S1.**  $^1\text{H}$ -NMR ( $\text{DMSO}-d_6$ ) spectra of *N*-(4,6-dimethoxy-1,3,5-triazin-2-yl)iminodiacetic acid 4.

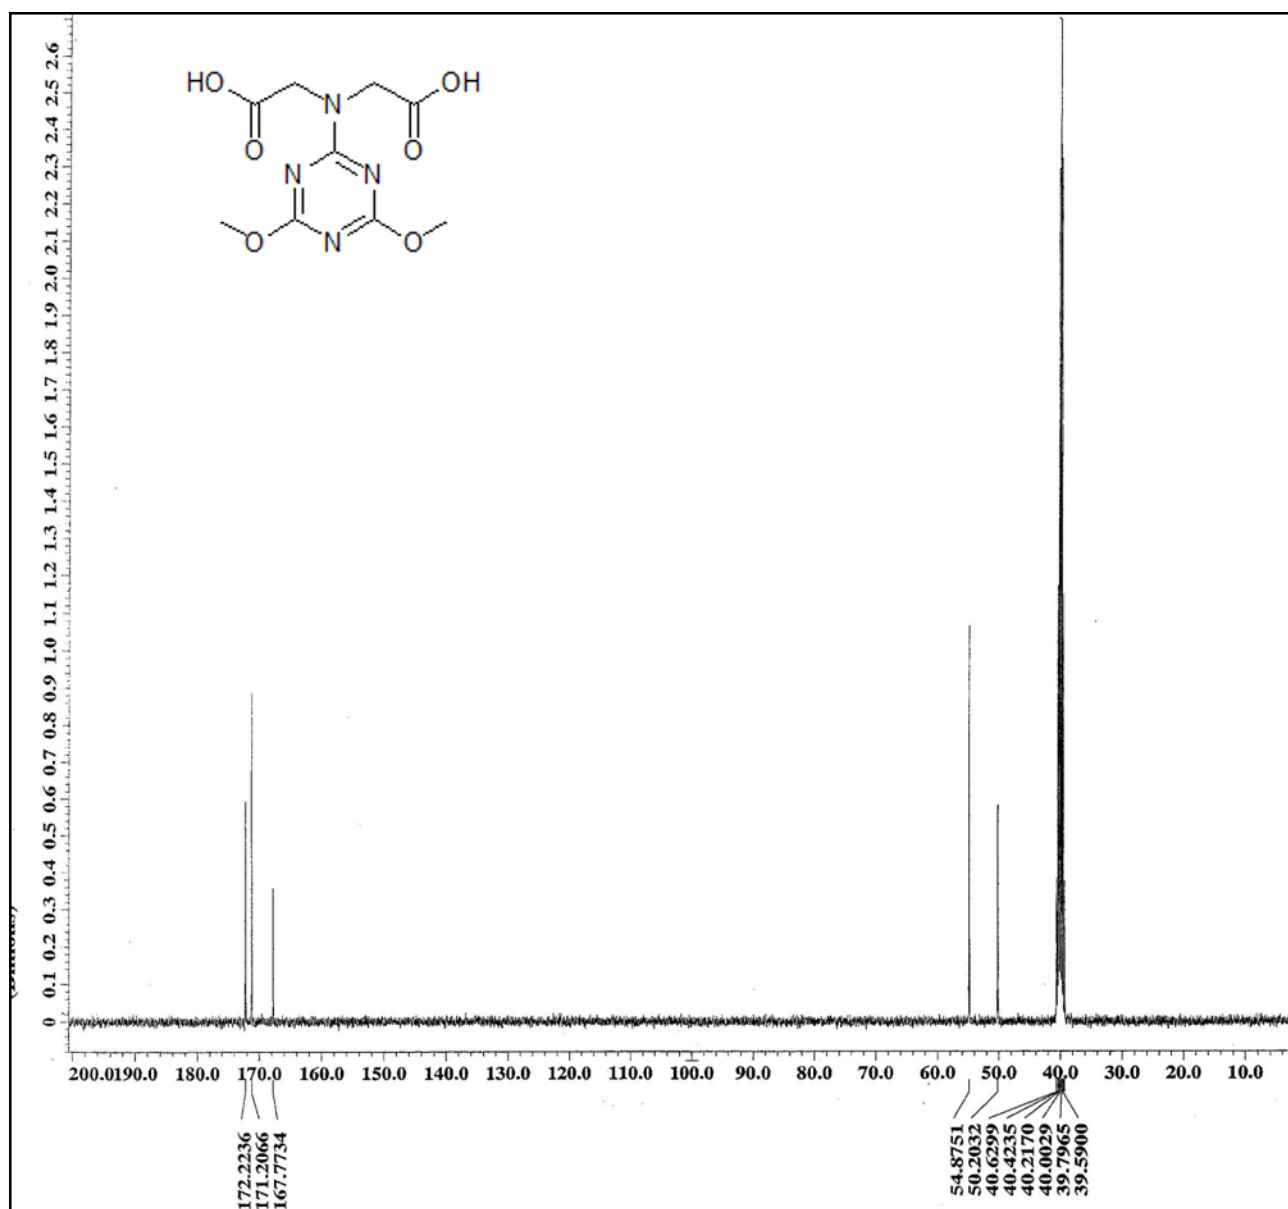

**Figure S2.**  $^{13}\text{C}$ -NMR ( $\text{DMSO-}d_6$ ) spectra of *N*-(4,6-dimethoxy-1,3,5-triazin-2-yl)iminodiacetic acid **4**.

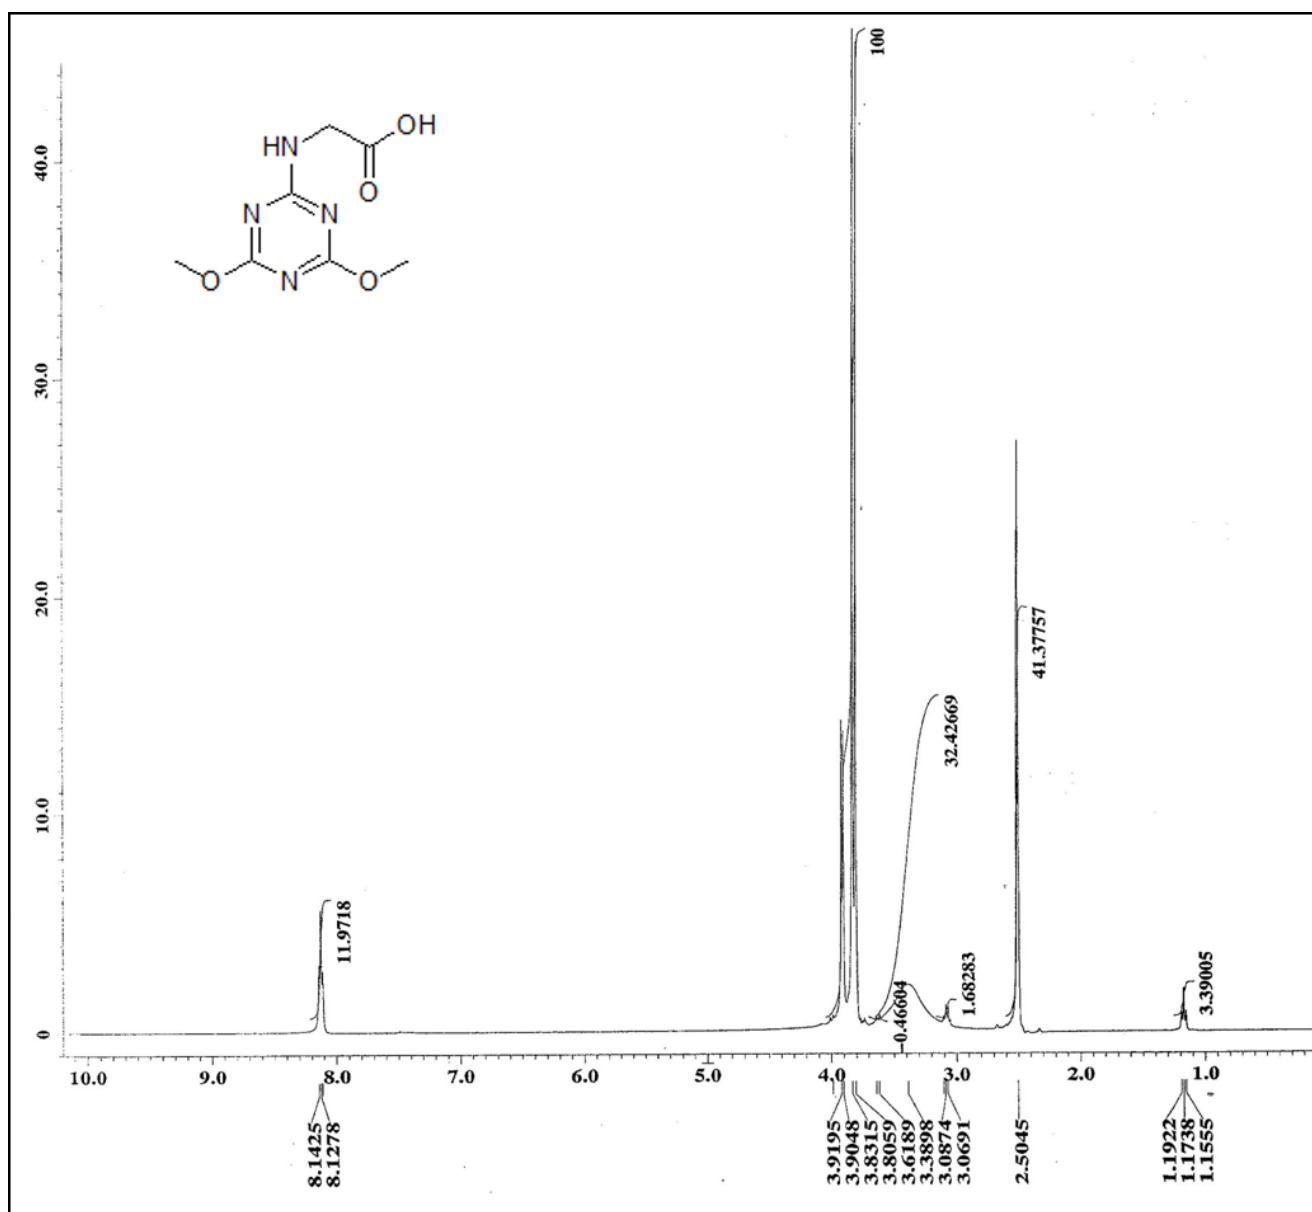

**Figure S3.** <sup>1</sup>H-NMR (DMSO-*d*<sub>6</sub>) spectra of 2-(4,6-dimethoxy-1,3,5-triazin-2-ylamino)acetic acid **5**.

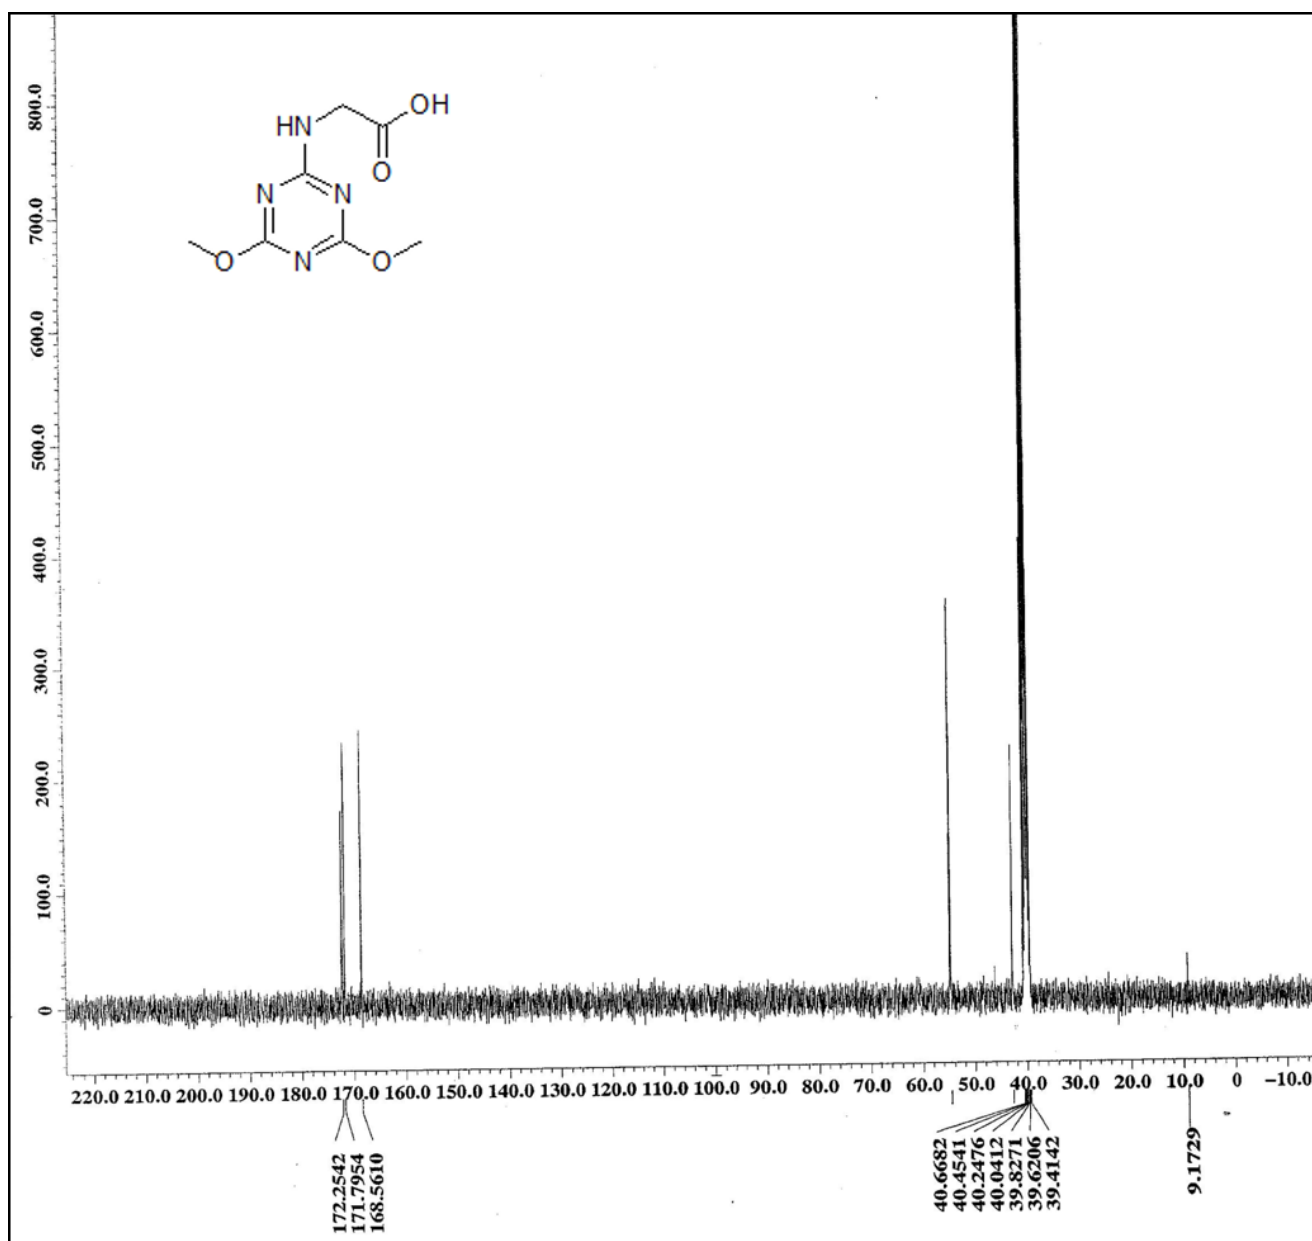

**Figure S4.**  $^{13}\text{C}$ -NMR ( $\text{DMSO}-d_6$ ) spectra of 2-(4,6-dimethoxy-1,3,5-triazin-2-ylamino)acetic acid **5**.

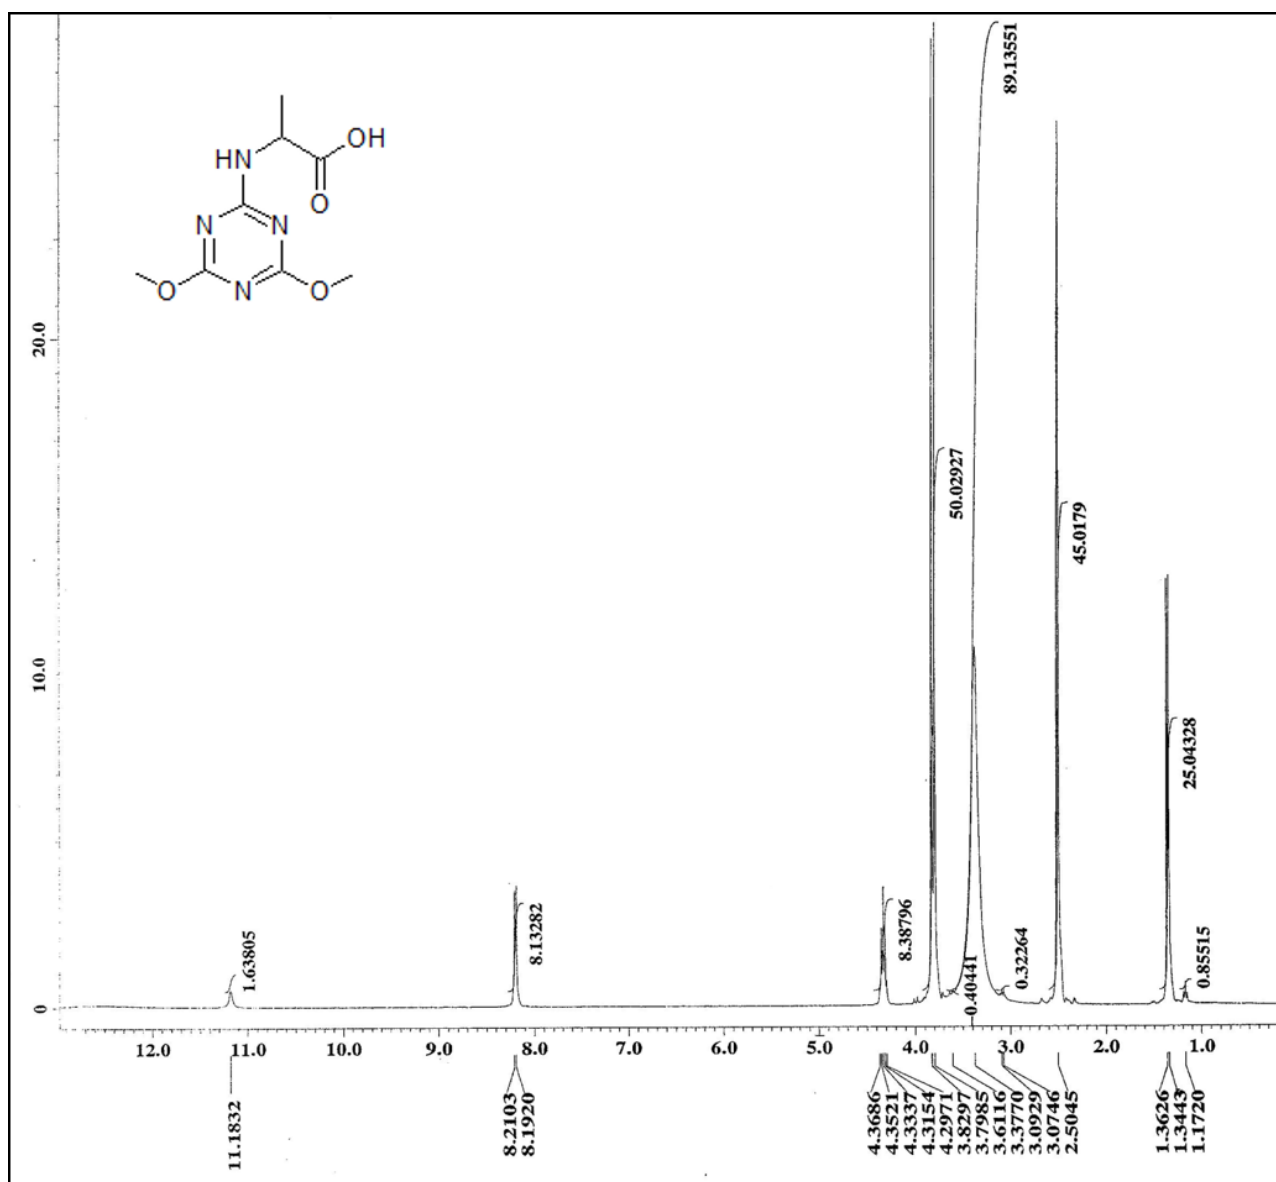

**Figure S5.** <sup>1</sup>H-NMR (DMSO-*d*<sub>6</sub>) spectra of 2-(4,6-dimethoxy-1,3,5-triazin-2-ylamino)propanoic acid **6**.

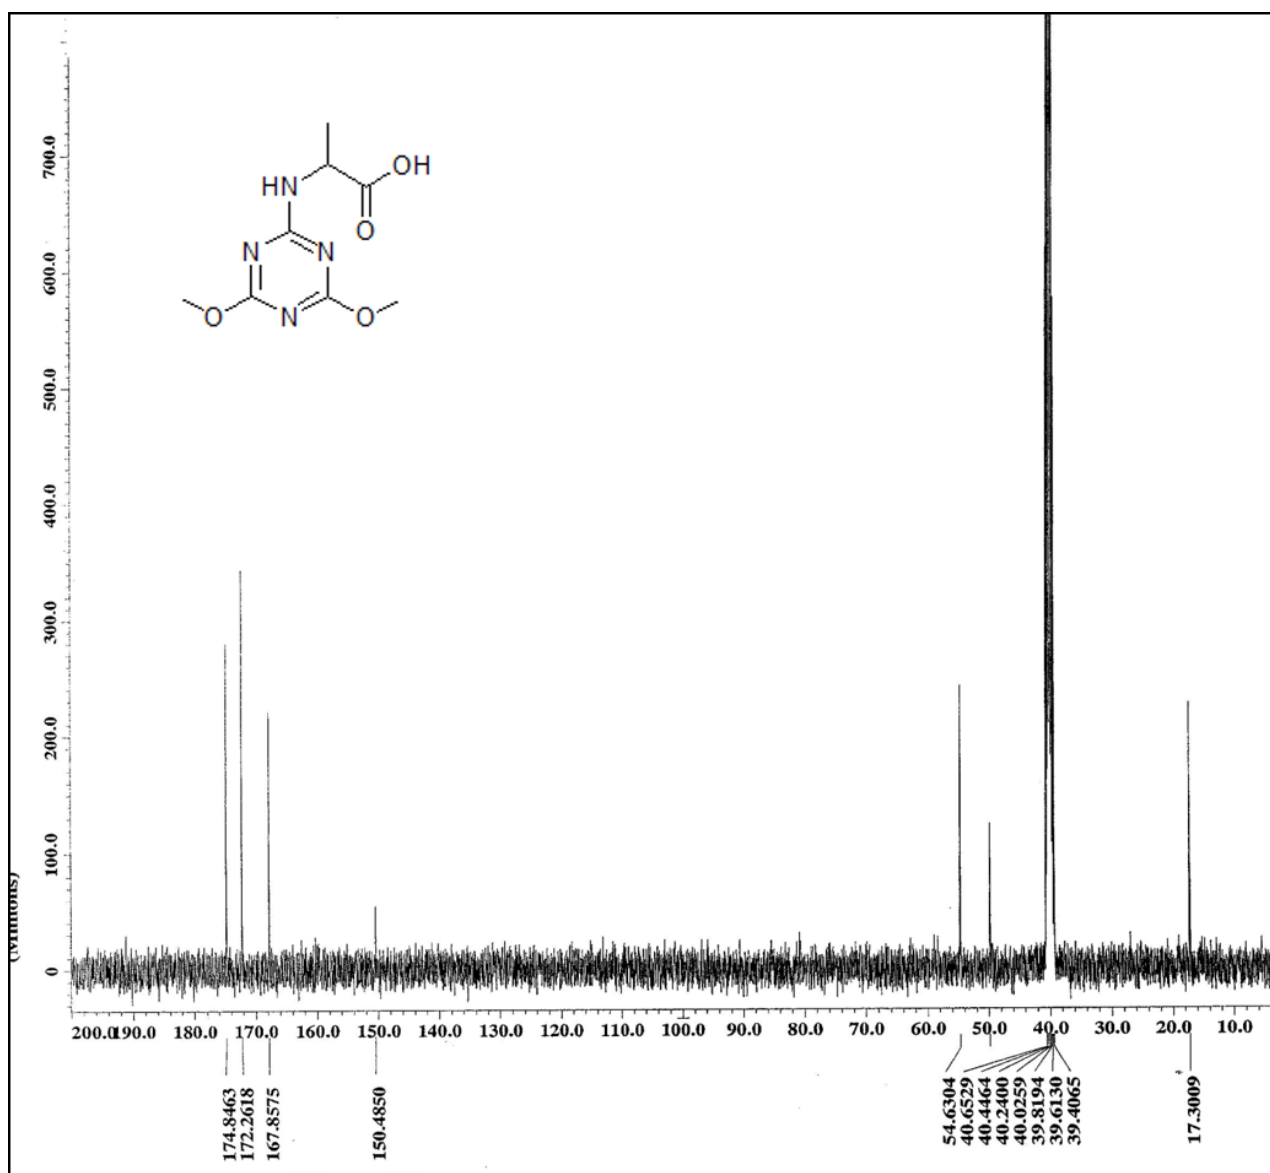

**Figure S6.**  $^{13}\text{C}$ -NMR ( $\text{DMSO}-d_6$ ) spectra of 2-(4,6-dimethoxy-1,3,5-triazin-2-ylamino)propanoic acid **6**.

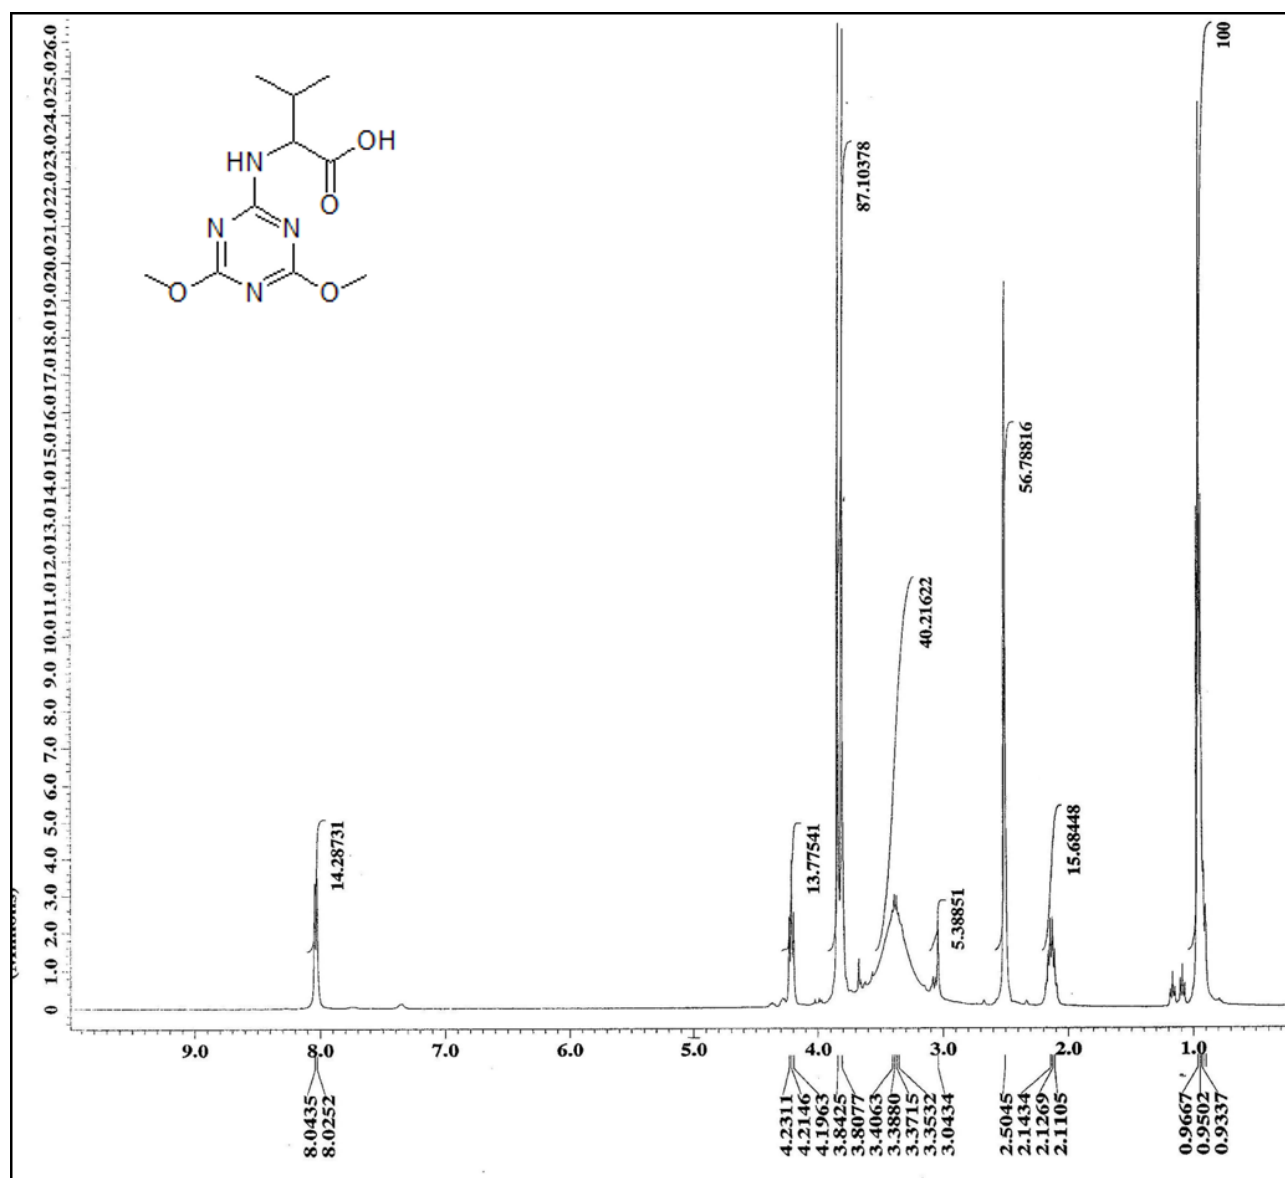

**Figure S7.** <sup>1</sup>H-NMR (DMSO-*d*<sub>6</sub>) spectra of 2-(4,6-dimethoxy-1,3,5-triazin-2-ylamino)-3-methylbutanoic acid 7.

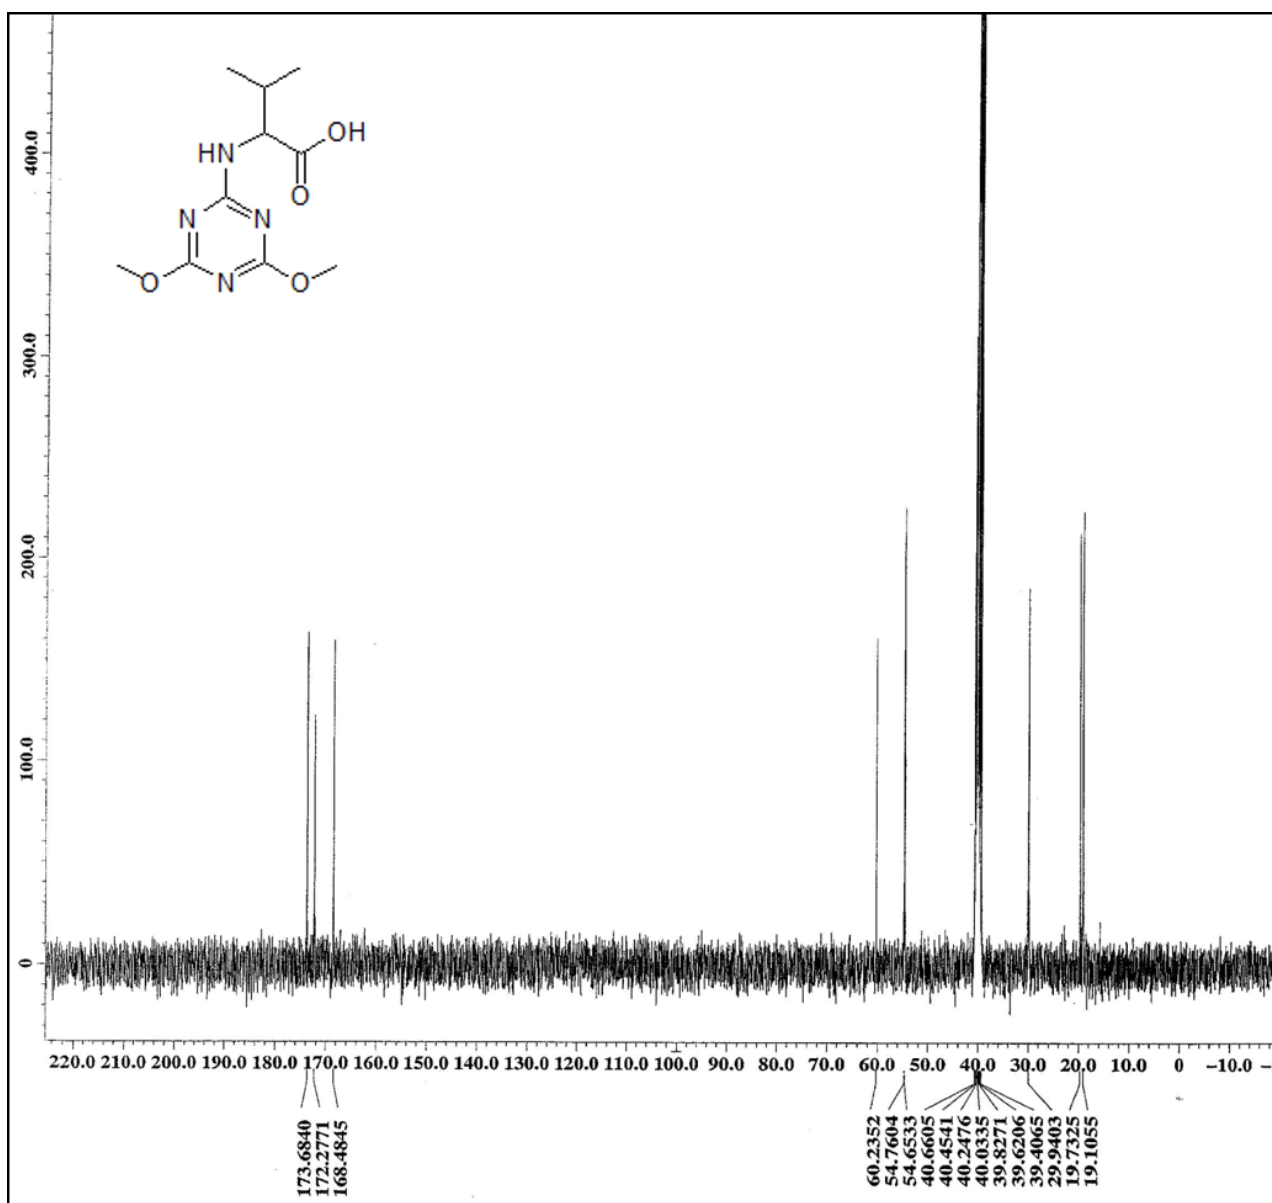

**Figure S8.**  $^{13}\text{C}$ -NMR ( $\text{DMSO}-d_6$ ) spectra of 2-(4,6-dimethoxy-1,3,5-triazin-2-ylamino)-3-methylbutanoic acid **7**.



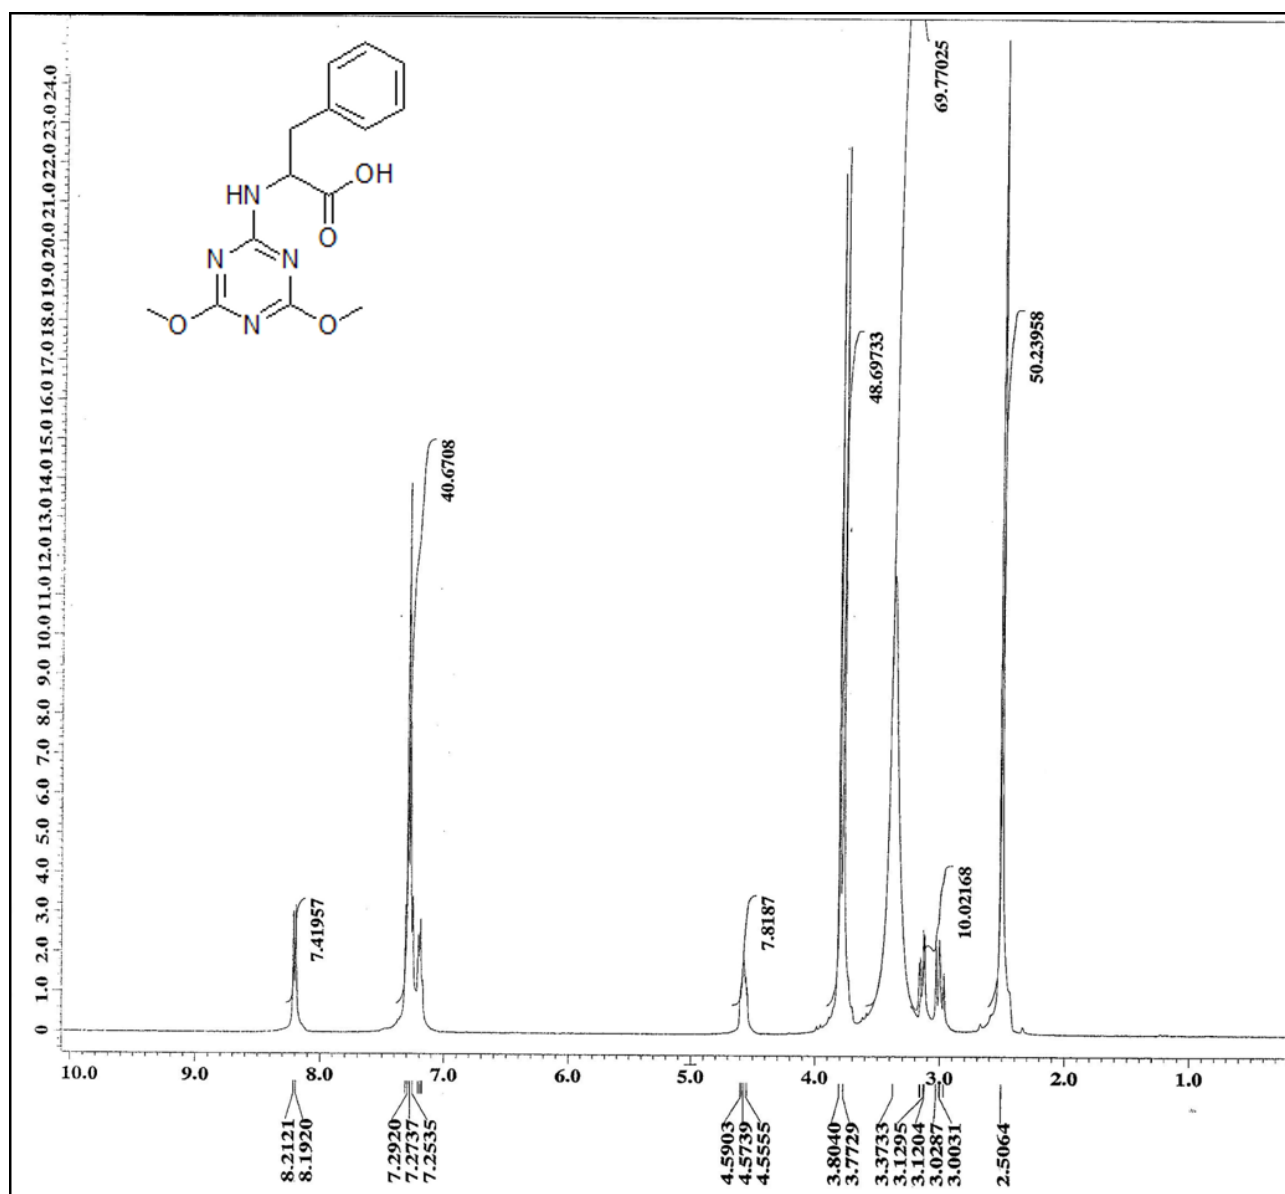

**Figure S9.** <sup>1</sup>H-NMR (DMSO-*d*<sub>6</sub>) spectra of 2-(4,6-dimethoxy-1,3,5-triazin-2-ylamino)-3-phenylpropanoic acid **8**.

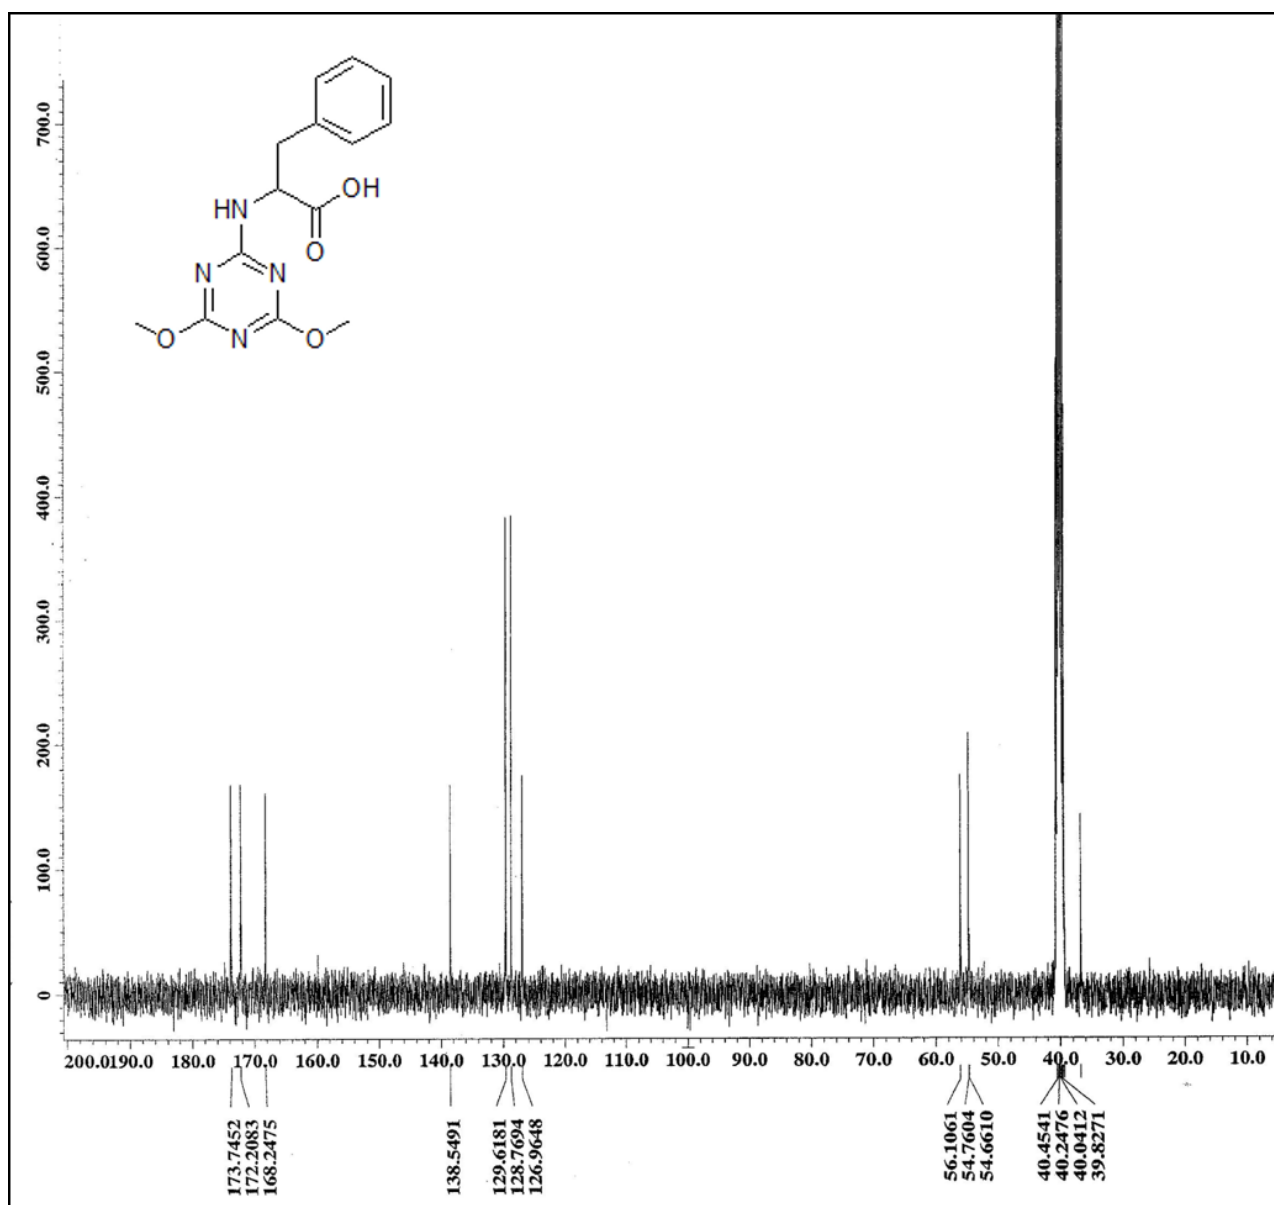

**Figure S10.**  $^{13}\text{C}$ -NMR ( $\text{DMSO}-d_6$ ) spectra of 2-(4,6-dimethoxy-1,3,5-triazin-2-ylamino)-3-phenylpropanoic acid **8**.

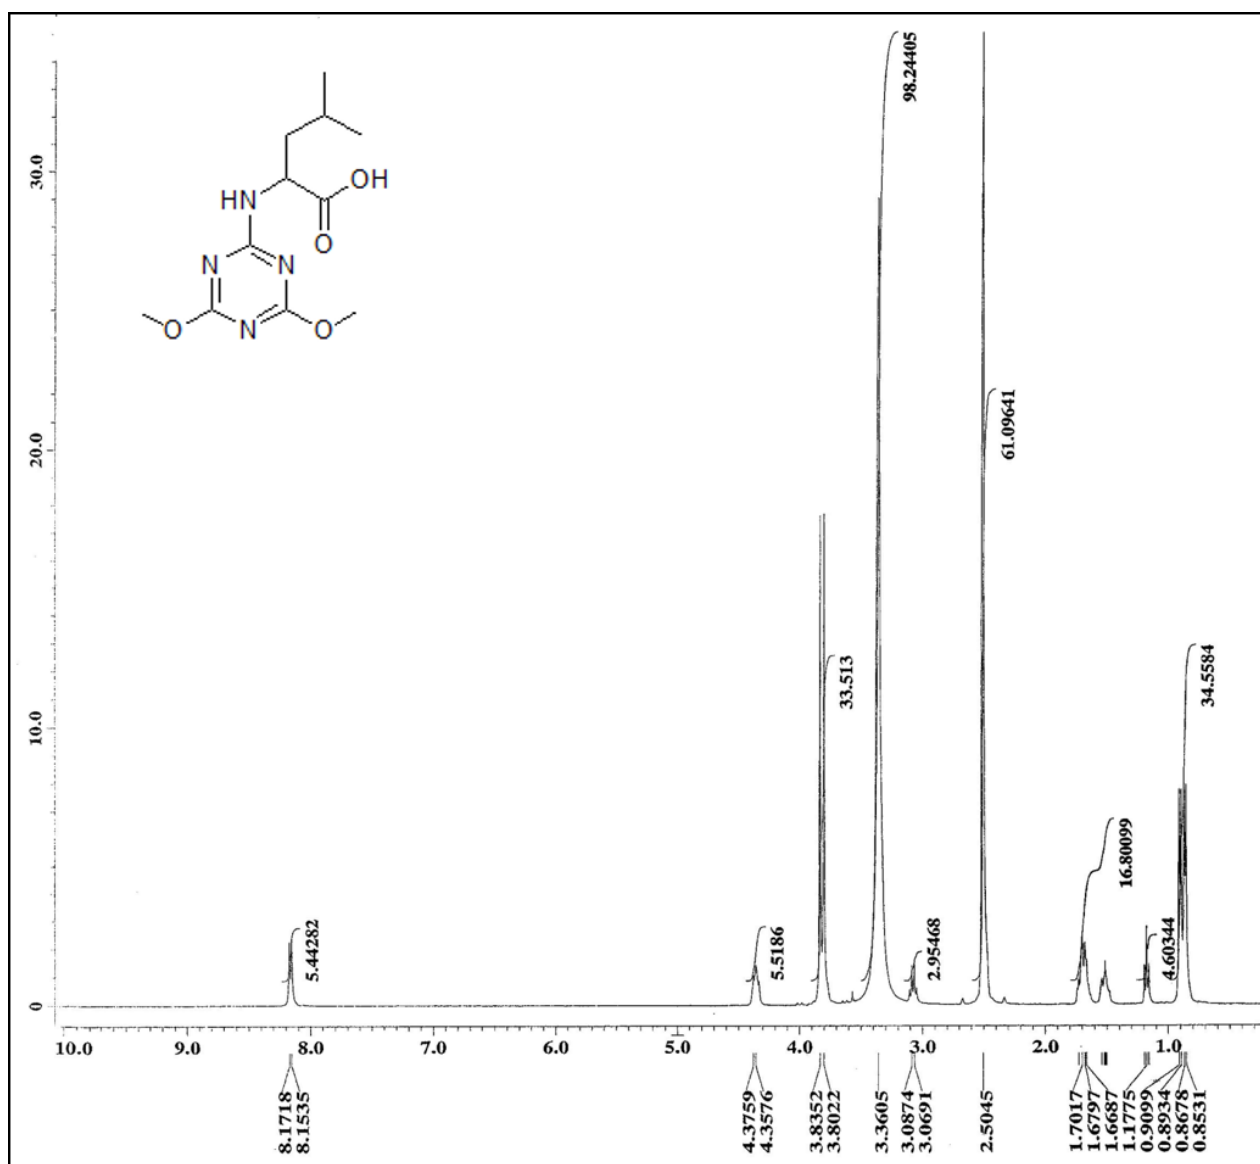

**Figure S11.** <sup>1</sup>H-NMR (400 MHz, DMSO-*d*<sub>6</sub>) spectra of 2-(4,6-dimethoxy-1,3,5-triazin-2-ylamino)-4-methylpentanoic acid **9**.

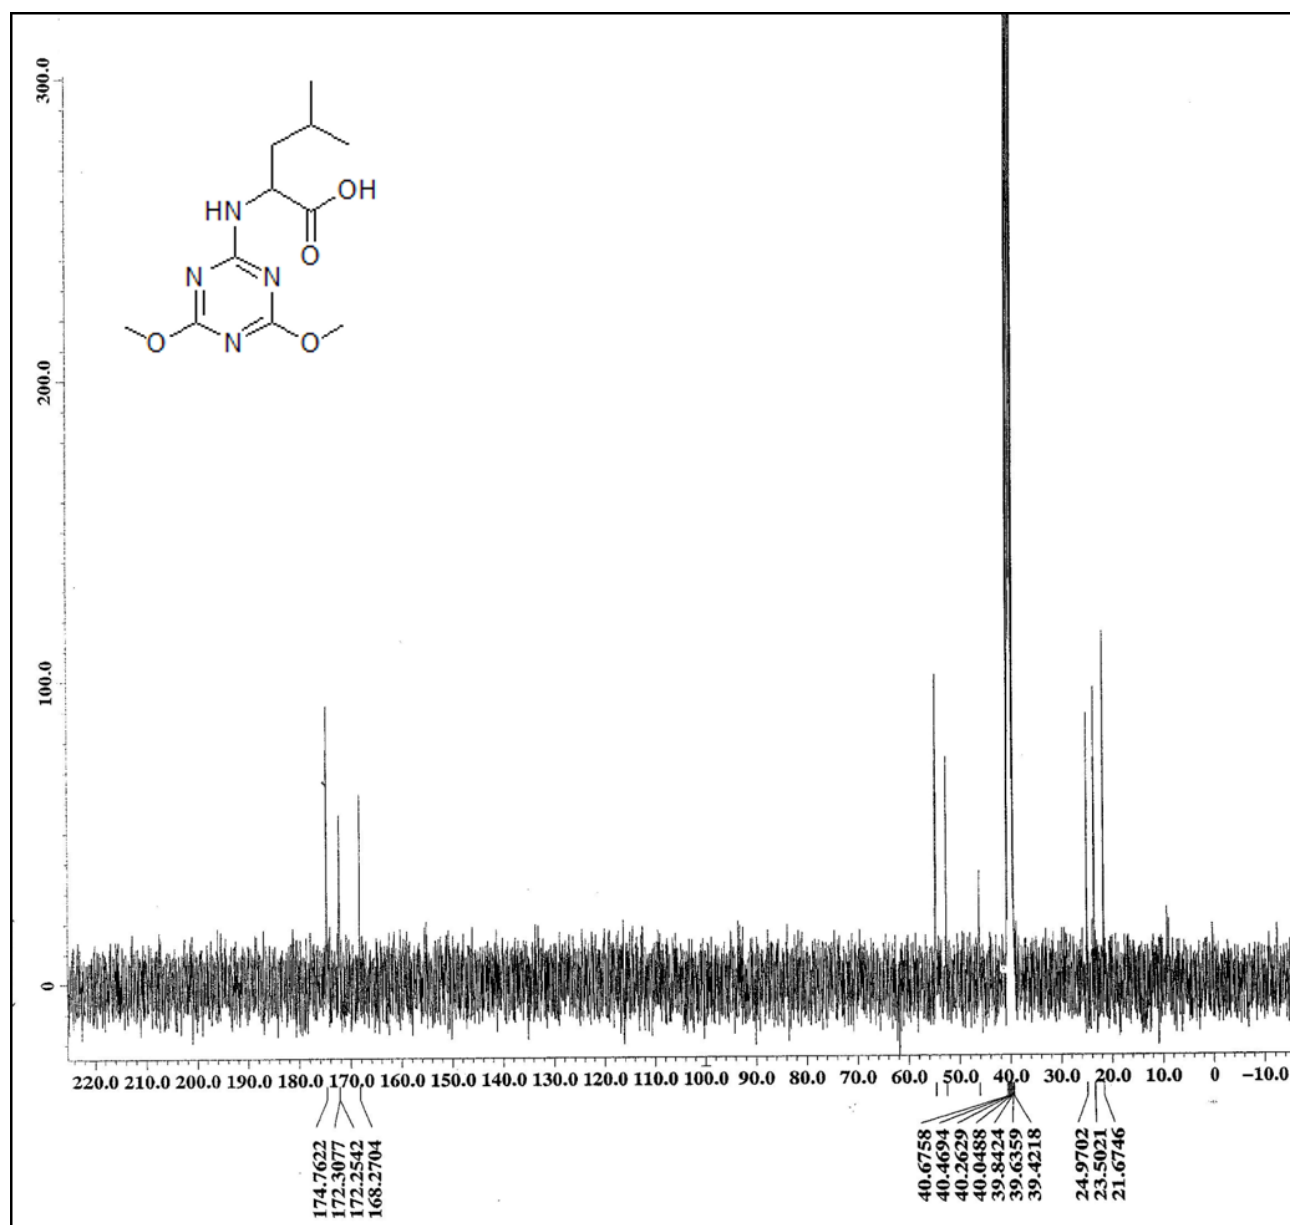

**Figure S12.**  $^{13}\text{C}$ -NMR (400 MHz,  $\text{DMSO}-d_6$ ) spectra of 2-(4,6-dimethoxy-1,3,5-triazin-2-ylamino)-4-methylpentanoic acid **9**.

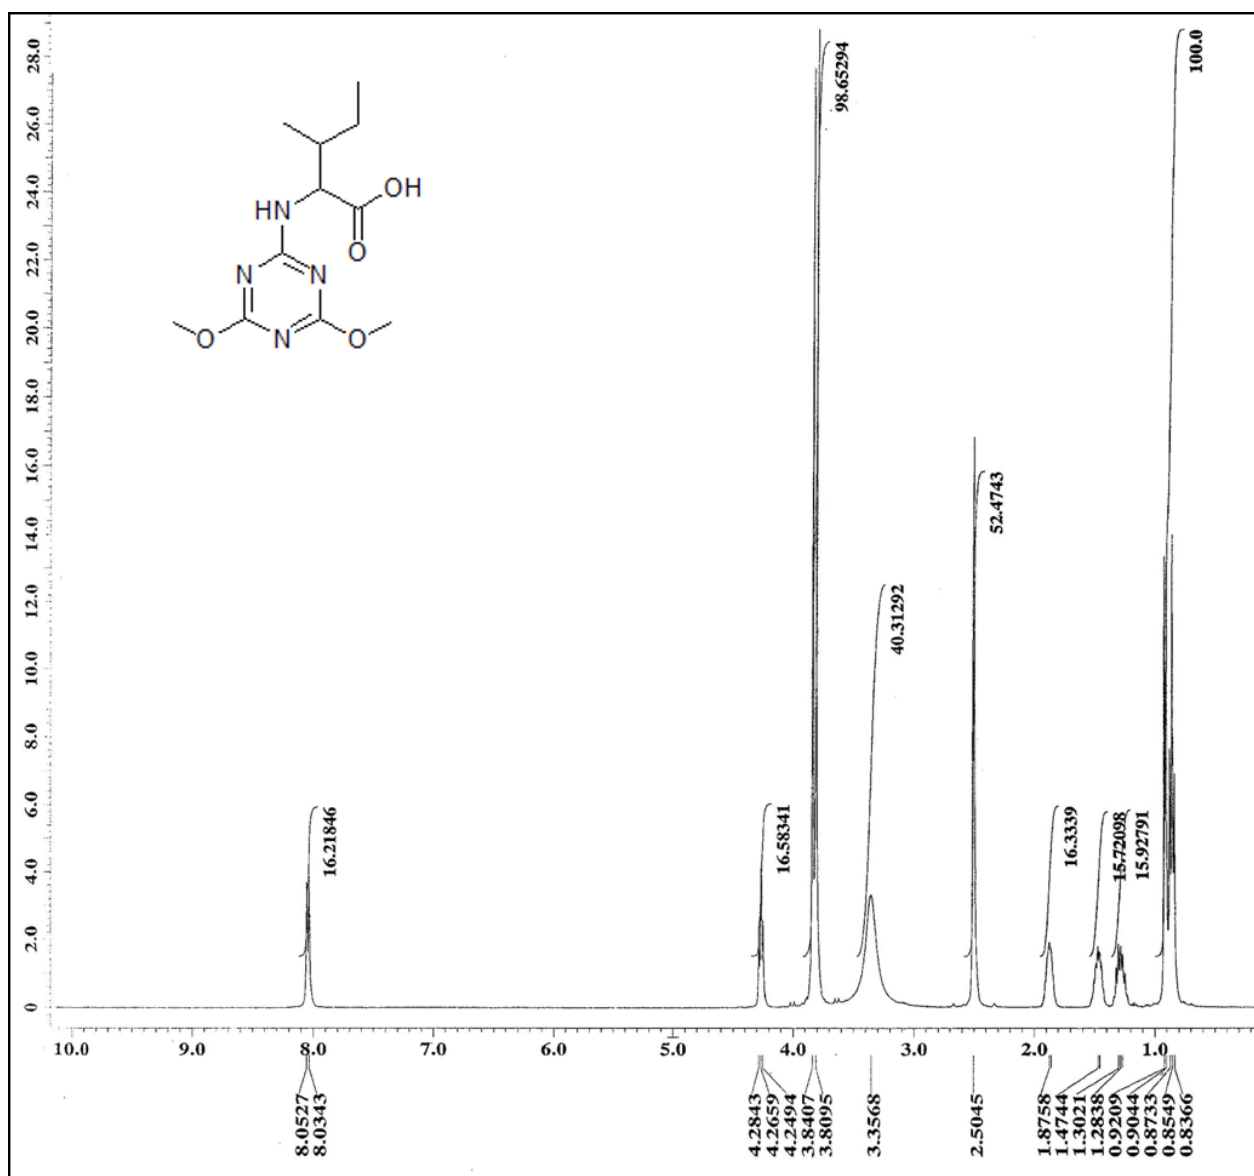

**Figure S13.** <sup>1</sup>H-NMR (400 MHz, DMSO-*d*<sub>6</sub>) spectra of 2-(4,6-dimethoxy-1,3,5-triazin-2-ylamino)-3-methylpentanoic acid **10**.

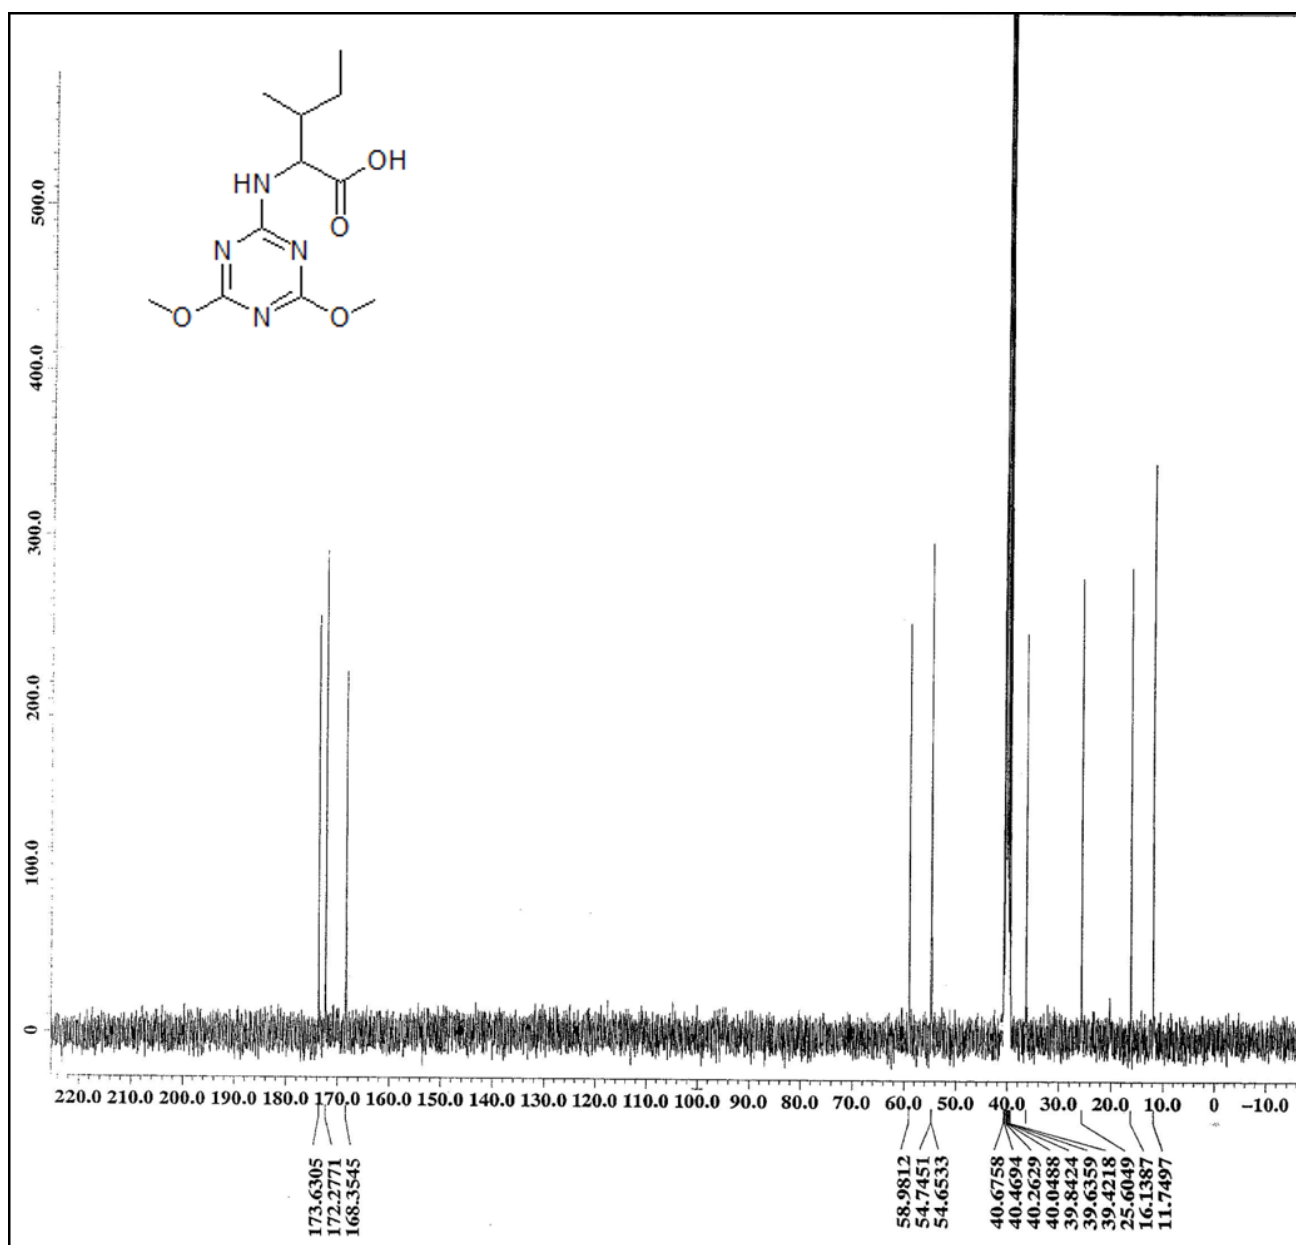

**Figure S14.**  $^{13}\text{C}$ -NMR (400 MHz,  $\text{DMSO}-d_6$ ) spectra of 2-(4,6-dimethoxy-1,3,5-triazin-2-ylamino)-3-methylpentanoic acid **10**.

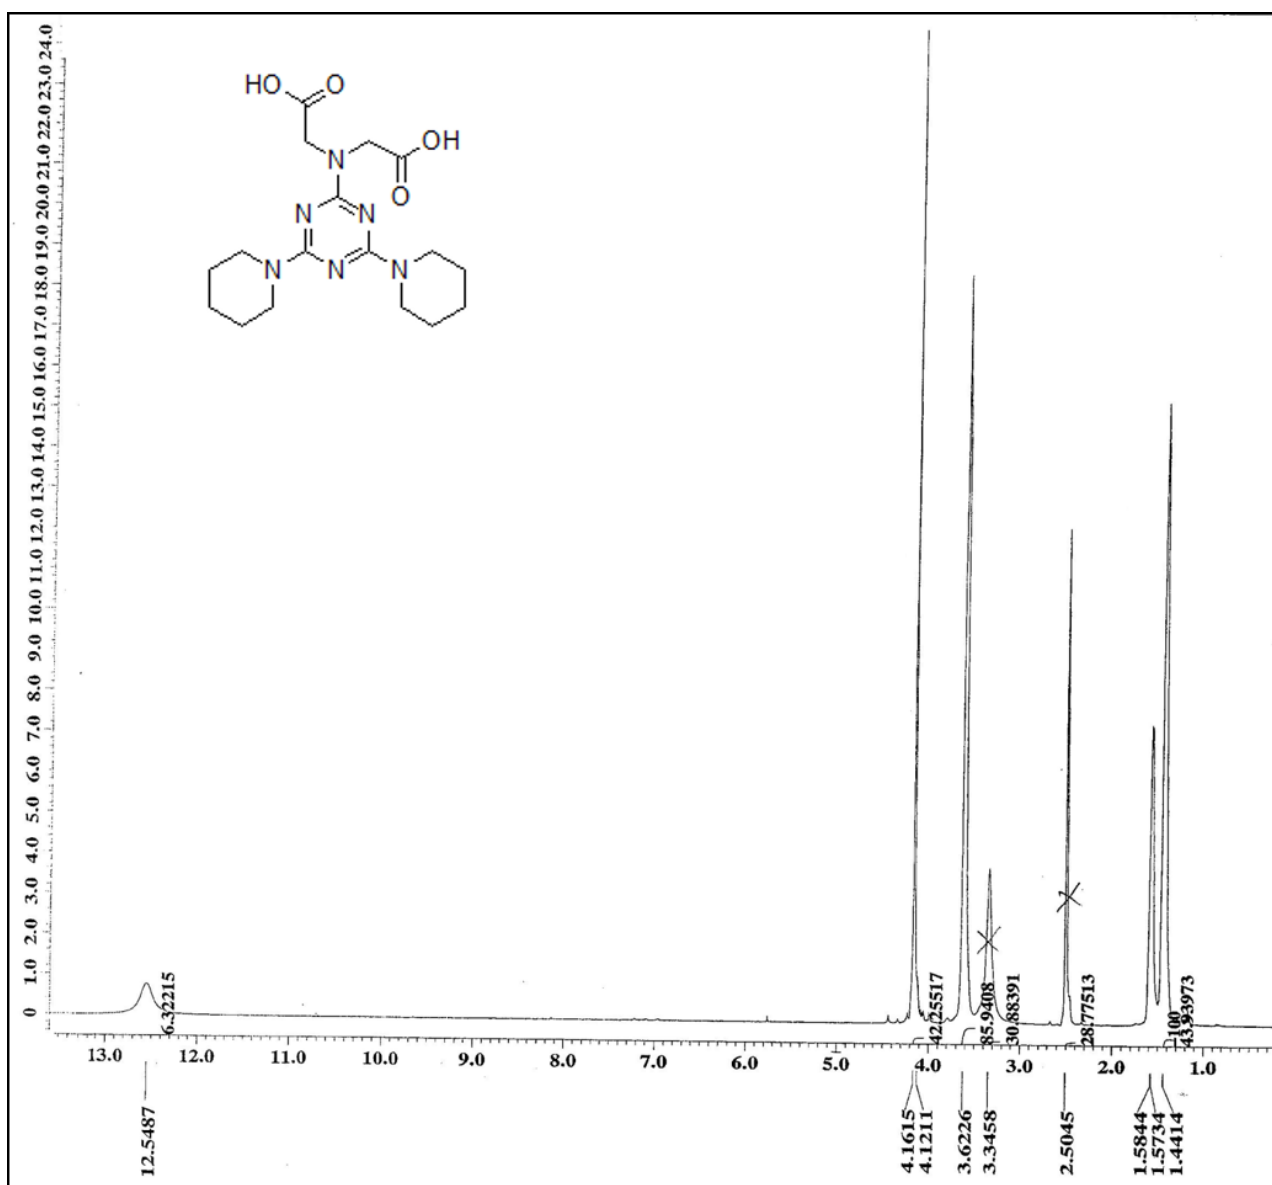

**Figure S15.** <sup>1</sup>H-NMR (400 MHz, DMSO-*d*<sub>6</sub>) spectra of *N*-(4,6-dipiperidino-1,3,5-triazin-2-yl)iminodiacetic acid **15**.

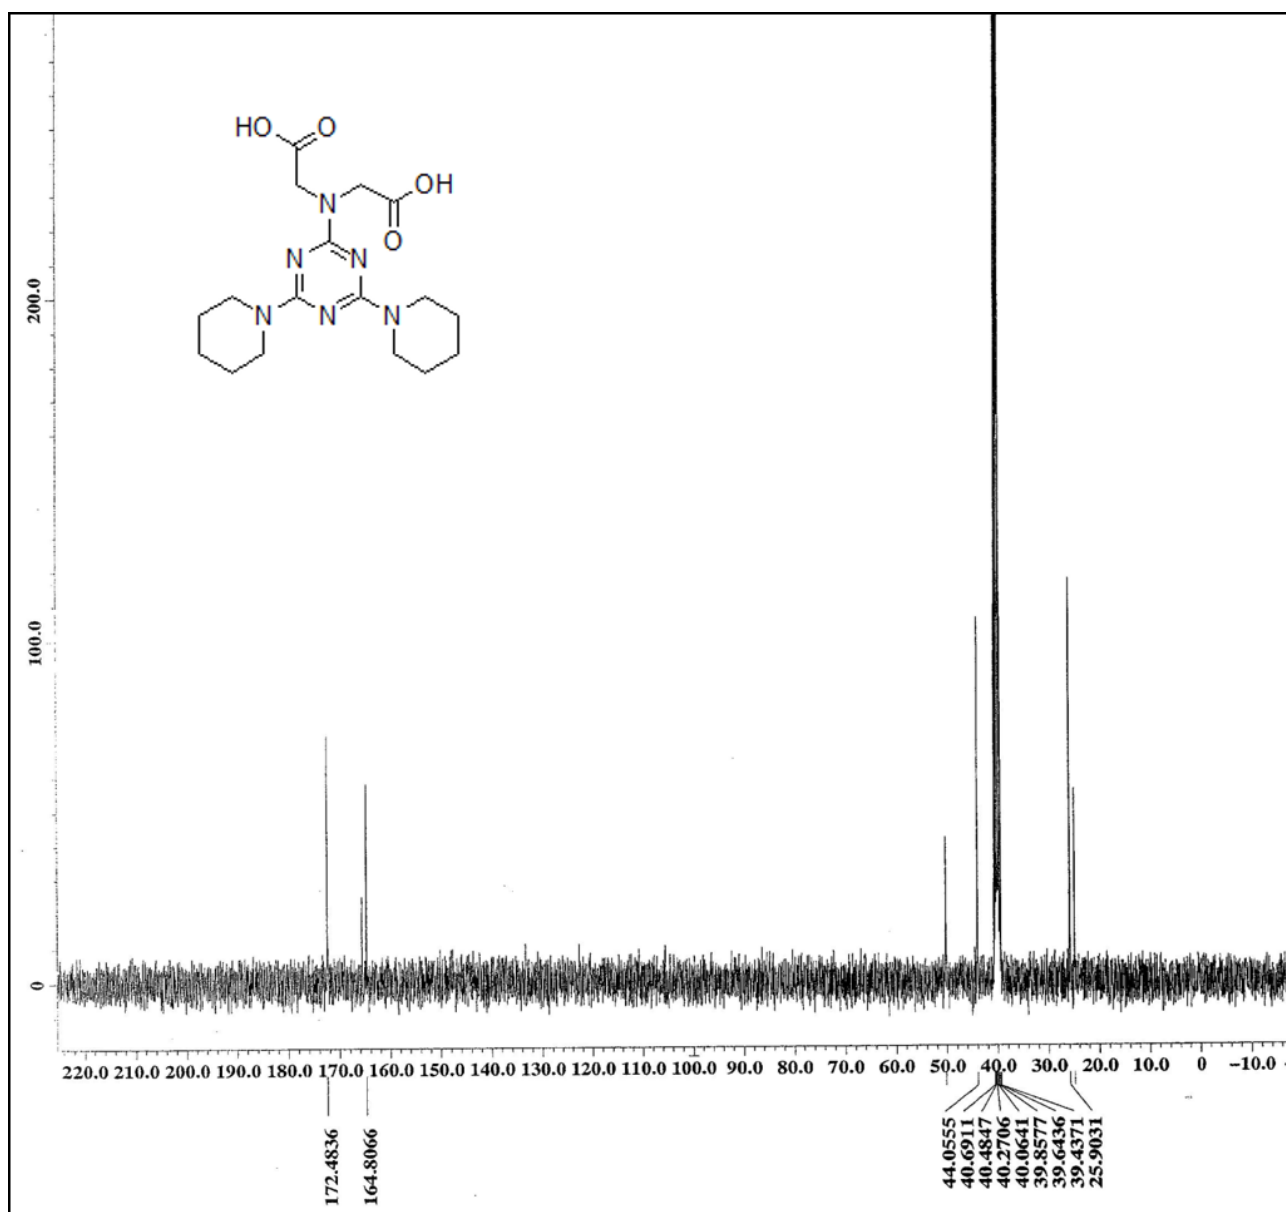

**Figure S16.**  $^{13}\text{C}$ -NMR (400 MHz,  $\text{DMSO}-d_6$ ) spectra of *N*-(4,6-dipiperidino-1,3,5-triazin-2-yl)iminodiacetic acid **15**.



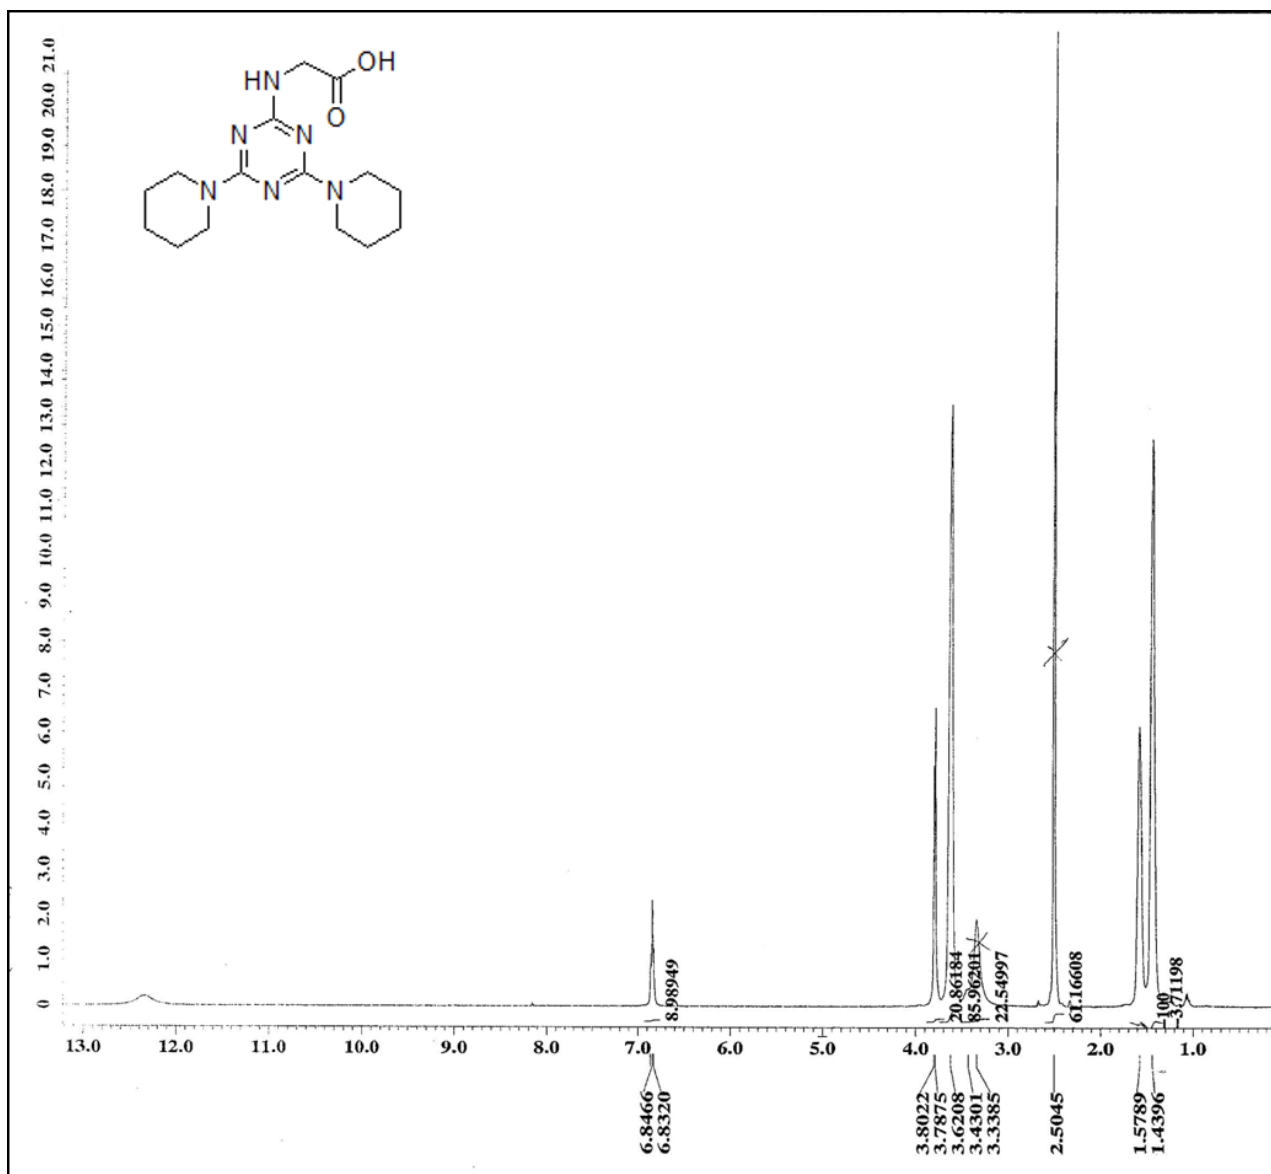

**Figure S17.** <sup>1</sup>H-NMR (DMSO-*d*<sub>6</sub>) spectra of 2-(4,6-di(piperidin-1-yl)-1,3,5-triazin-2-ylamino)acetic acid **16**.

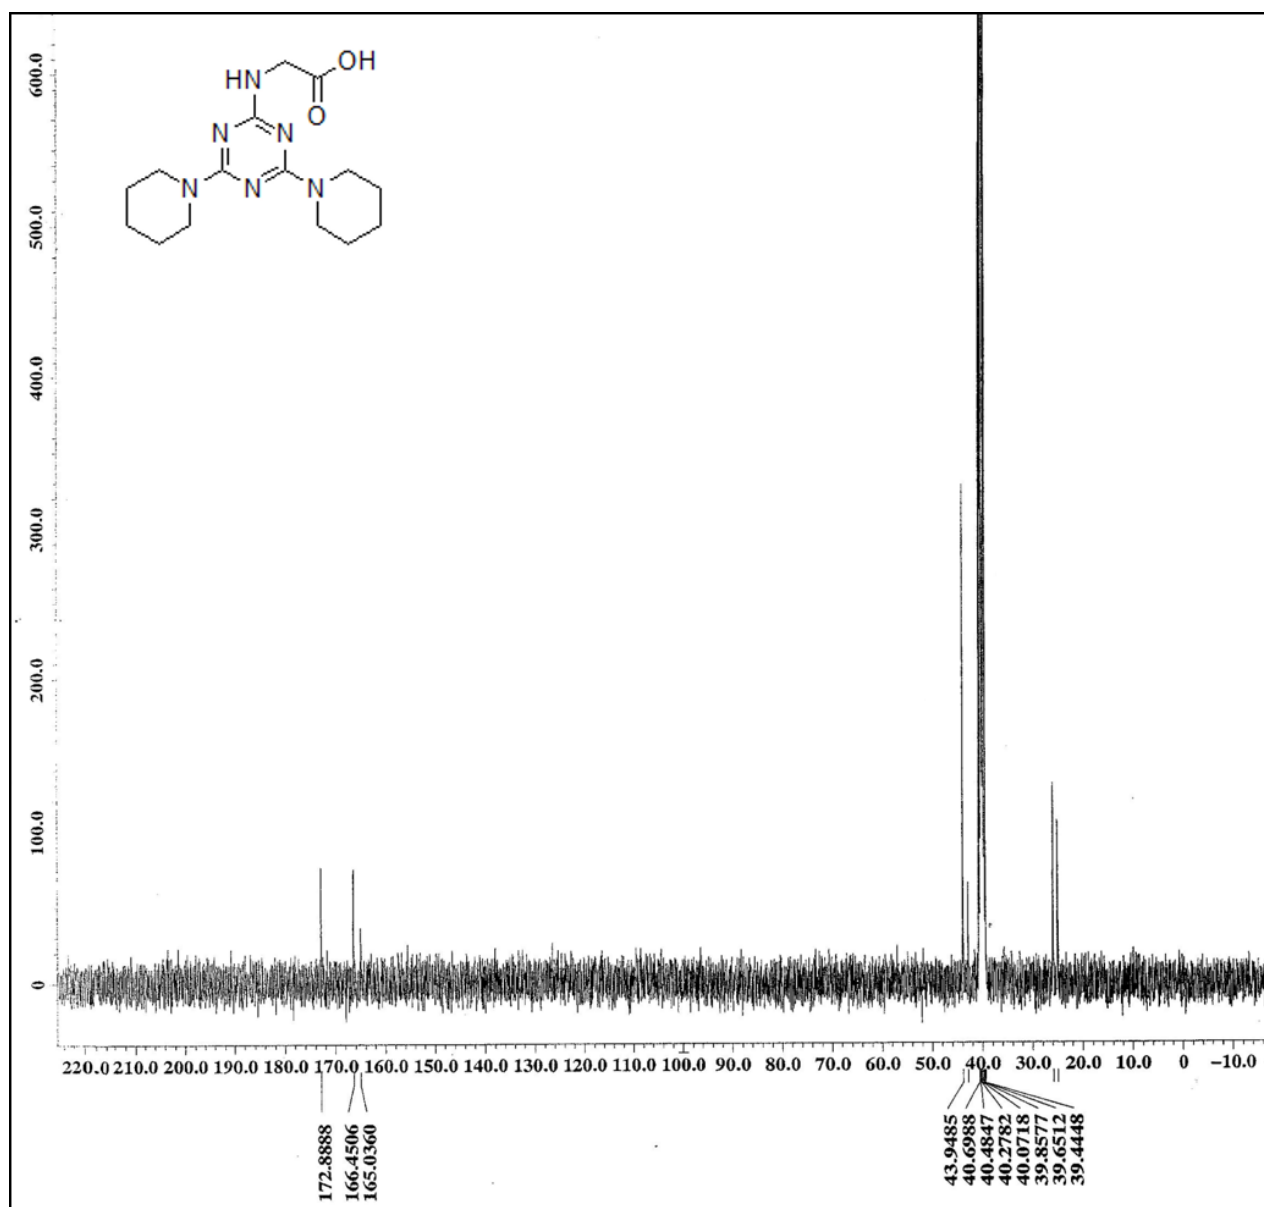

**Figure S18.**  $^{13}\text{C}$ -NMR (DMSO- $d_6$ ) spectra of 2-(4,6-di(piperidin-1-yl)-1,3,5-triazin-2-ylamino)acetic acid **16**.

**Figure S19.** <sup>1</sup>H-NMR (DMSO-*d*<sub>6</sub>) spectra of 2-(4,6-di(piperidin-1-yl)-1,3,5-triazin-2-ylamino) propanoic acid **17**.

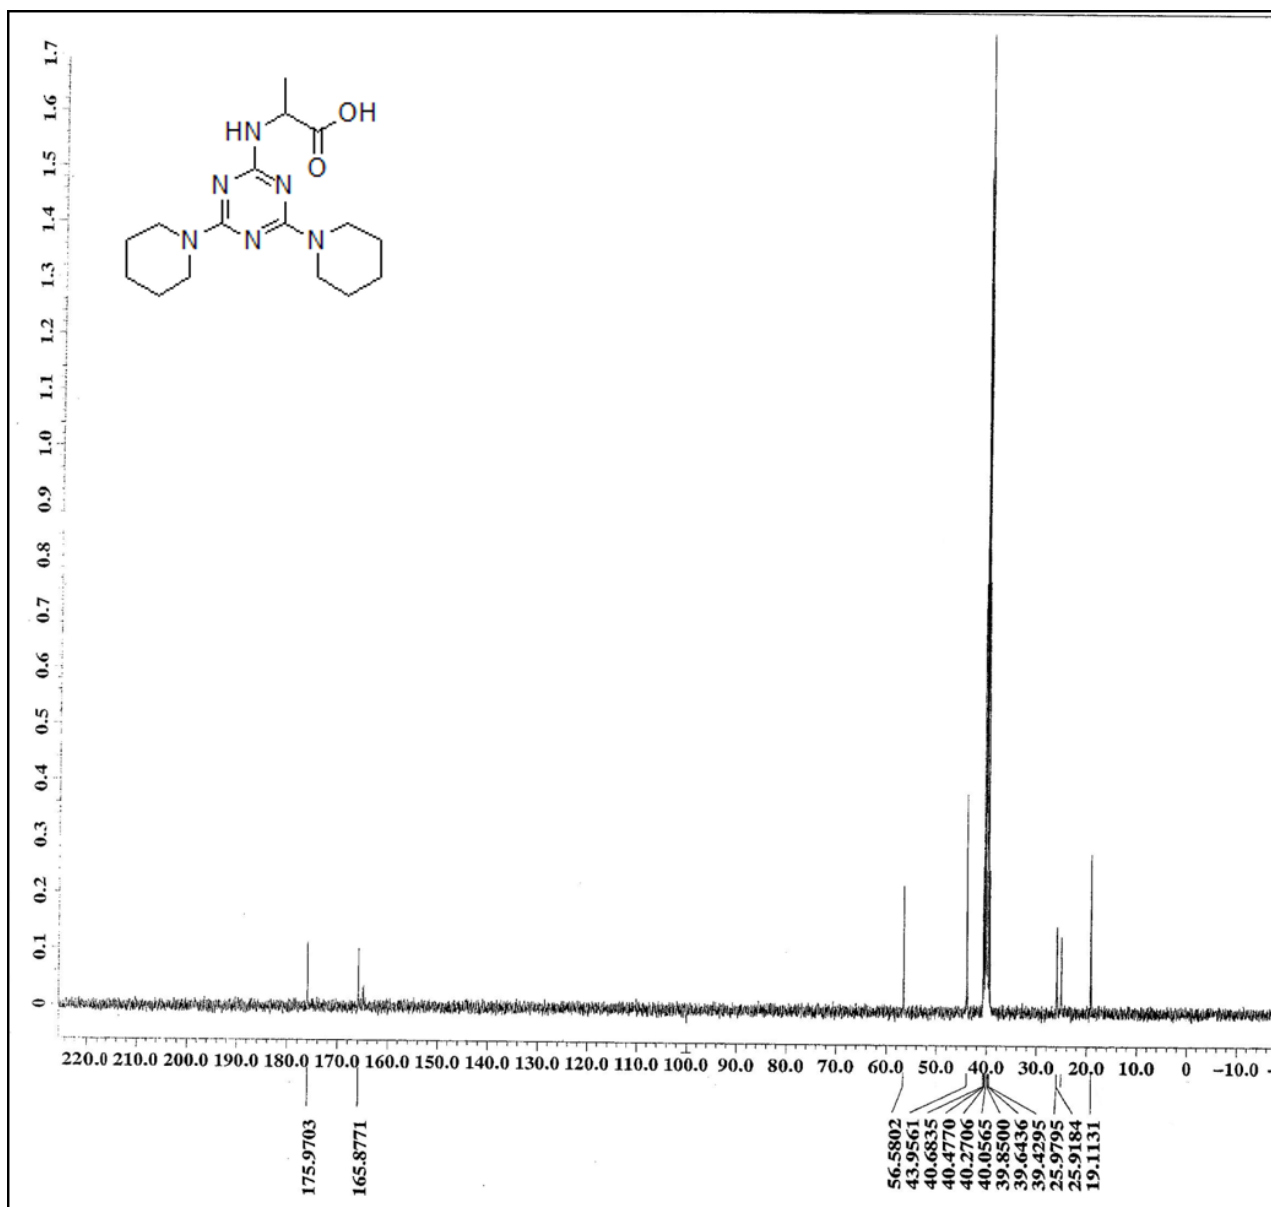

**Figure S20.** <sup>13</sup>C-NMR (DMSO-*d*<sub>6</sub>) spectra of 2-(4,6-di(piperidin-1-yl)-1,3,5-triazin-2-ylamino)propanoic acid **17**.

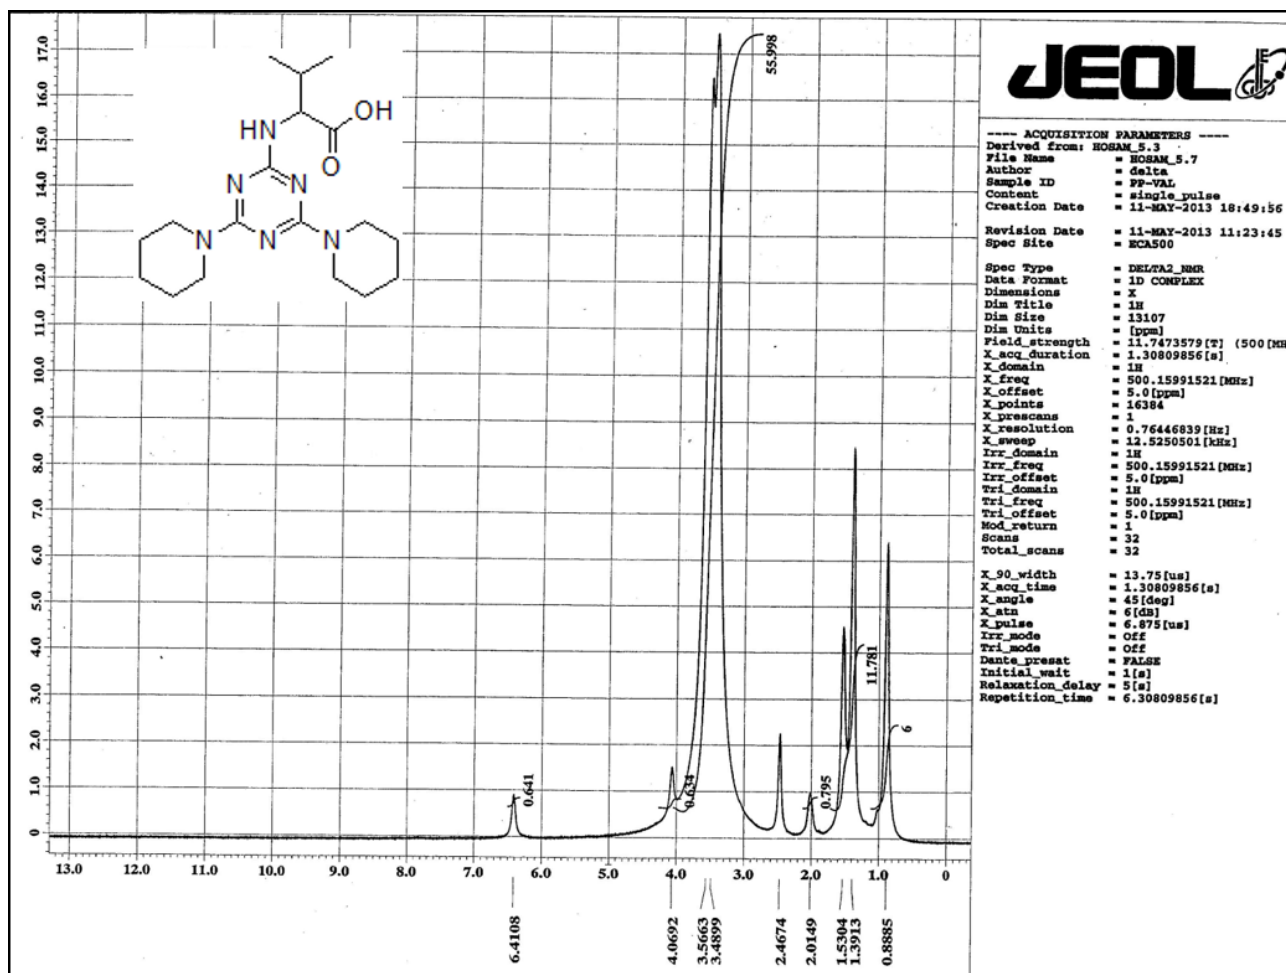

**Figure S21.**  $^1\text{H}$ -NMR (500 MHz,  $\text{DMSO}-d_6$ ) spectrum of 2-(4,6-di(piperidin-1-yl)-1,3,5-triazin-2-ylamino)-3-methylbutanoic acid **18**.

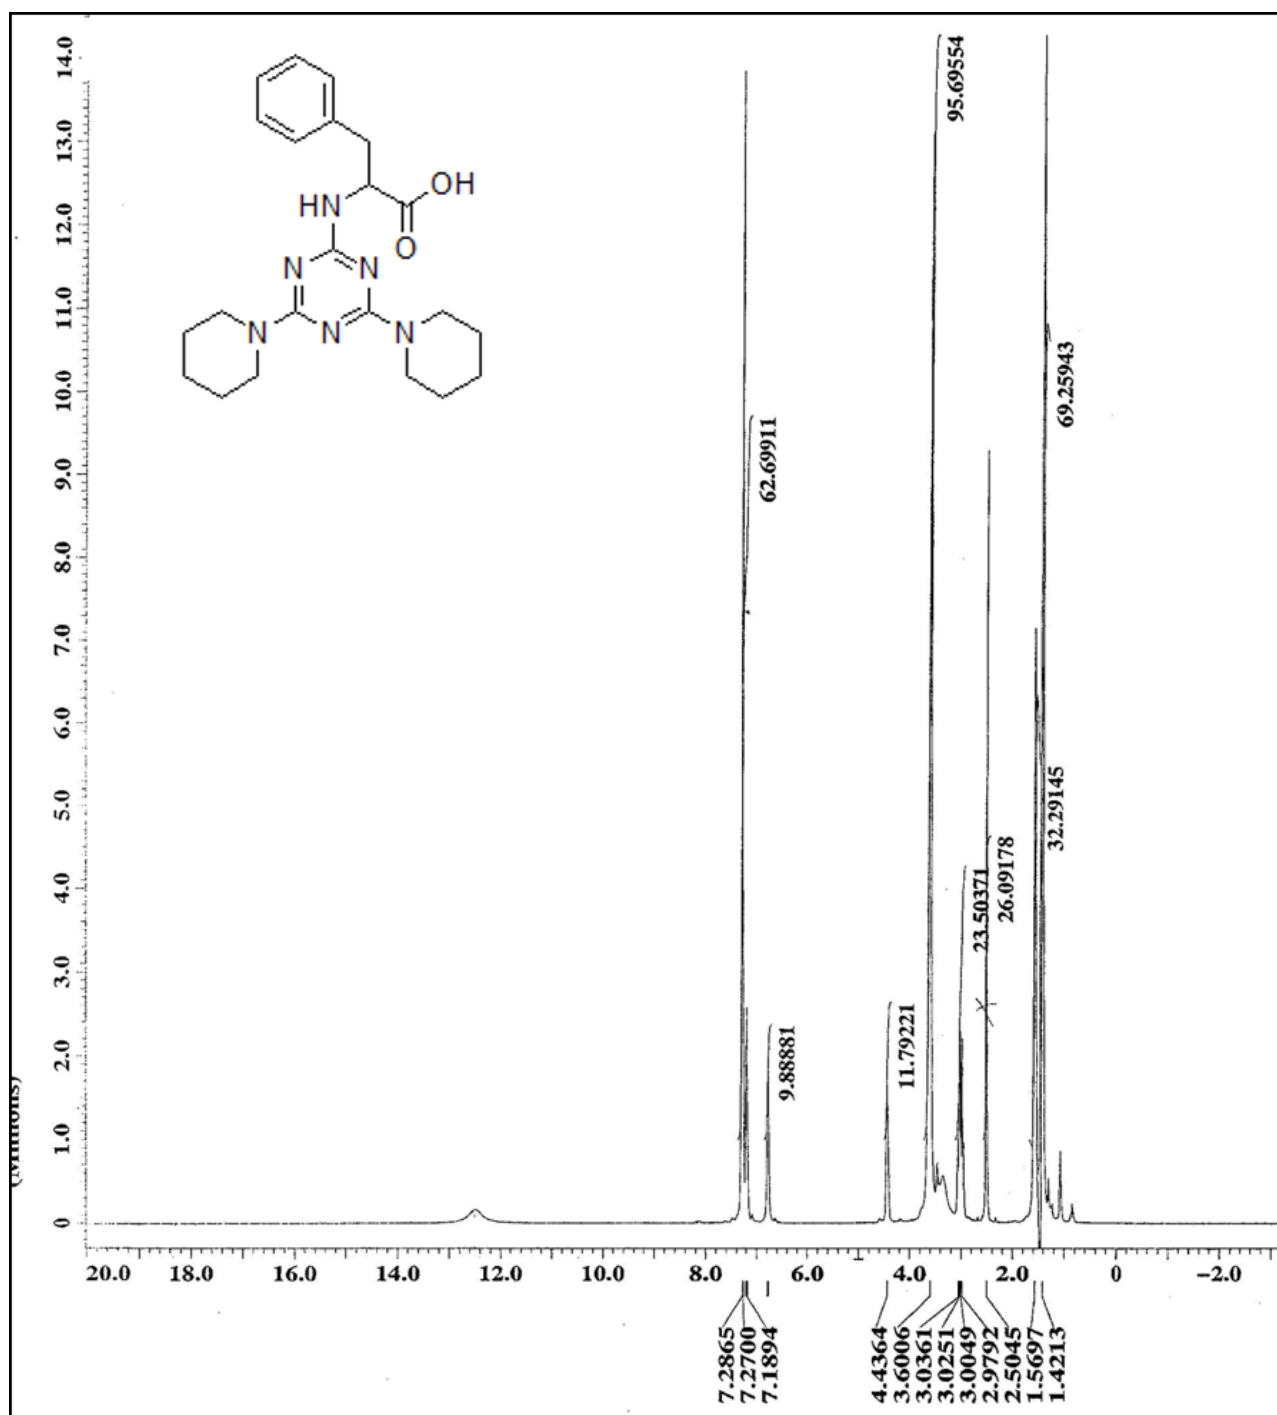

**Figure S22.** <sup>1</sup>H-NMR (DMSO-*d*<sub>6</sub>) spectra of 2-(4,6-di(piperidin-1-yl)-1,3,5-triazin-2-ylamino)-3-phenylpropanoic acid **19**.

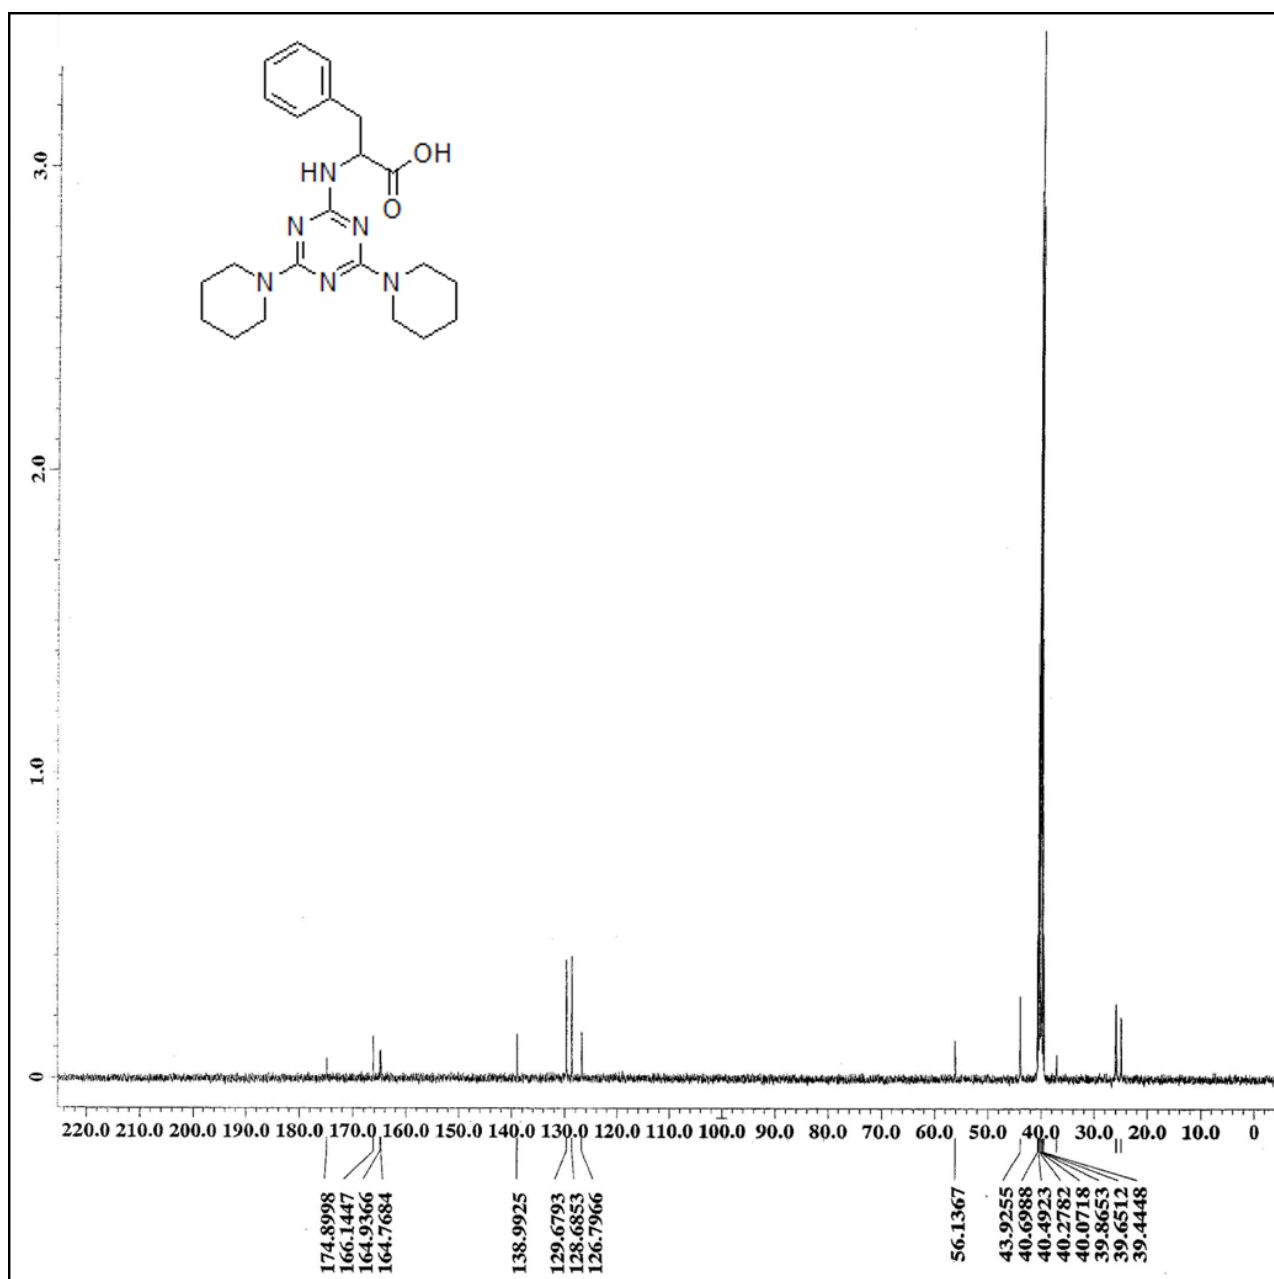

**Figure S23.** <sup>13</sup>C-NMR (DMSO-*d*<sub>6</sub>) spectra of 2-(4,6-di(piperidin-1-yl)-1,3,5-triazin-2-ylamino)-3-phenylpropanoic acid **19**.

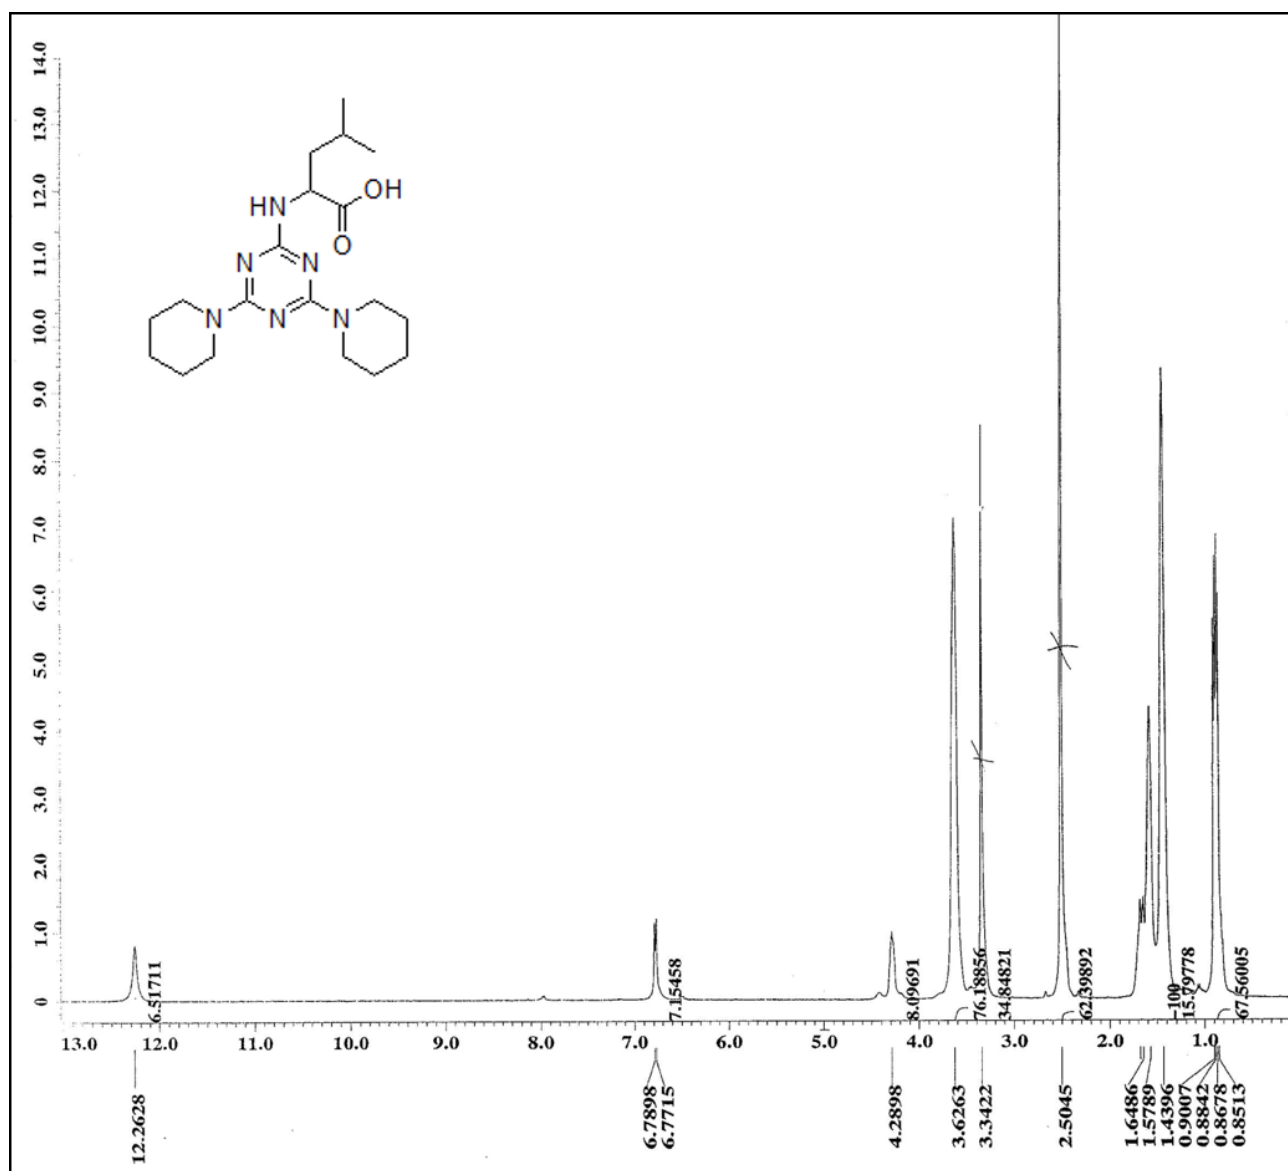

**Figure S24.** <sup>1</sup>H-NMR (DMSO-*d*<sub>6</sub>) spectra of 2-(4,6-di(piperidin-1-yl)-1,3,5-triazin-2-ylamino)-4-methylpentanoic acid **20**.



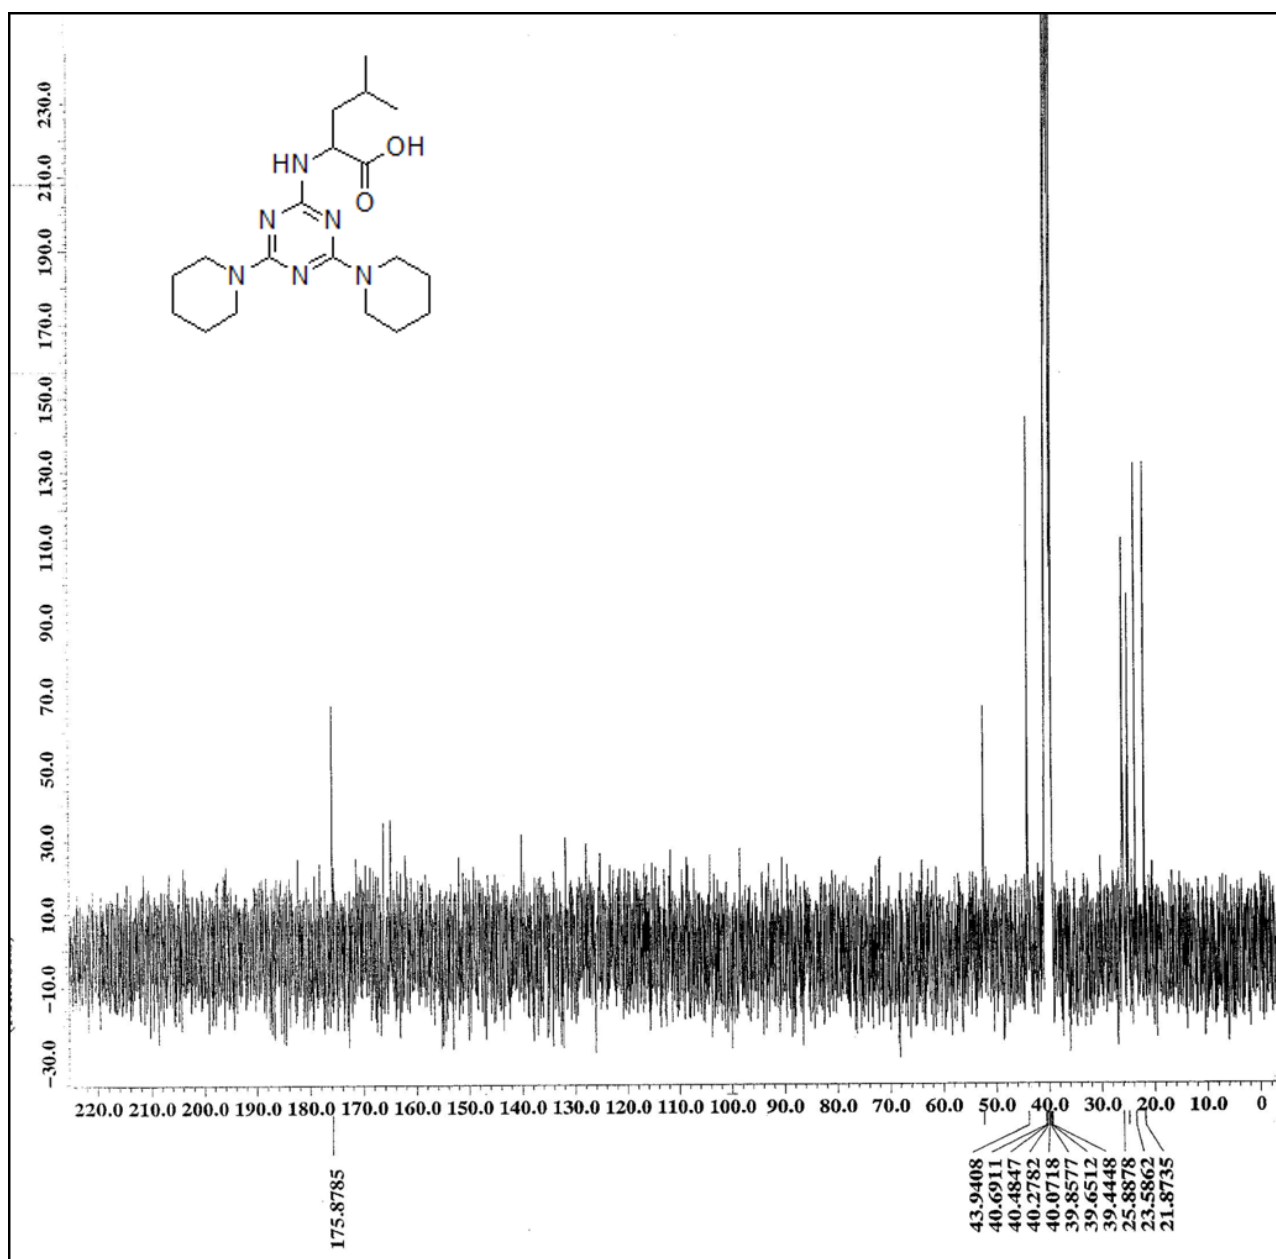

**Figure S25.**  $^{13}\text{C}$ -NMR (DMSO- $d_6$ ) spectra of 2-(4,6-di(piperidin-1-yl)-1,3,5-triazin-2-ylamino)-4-methylpentanoic acid **20**.

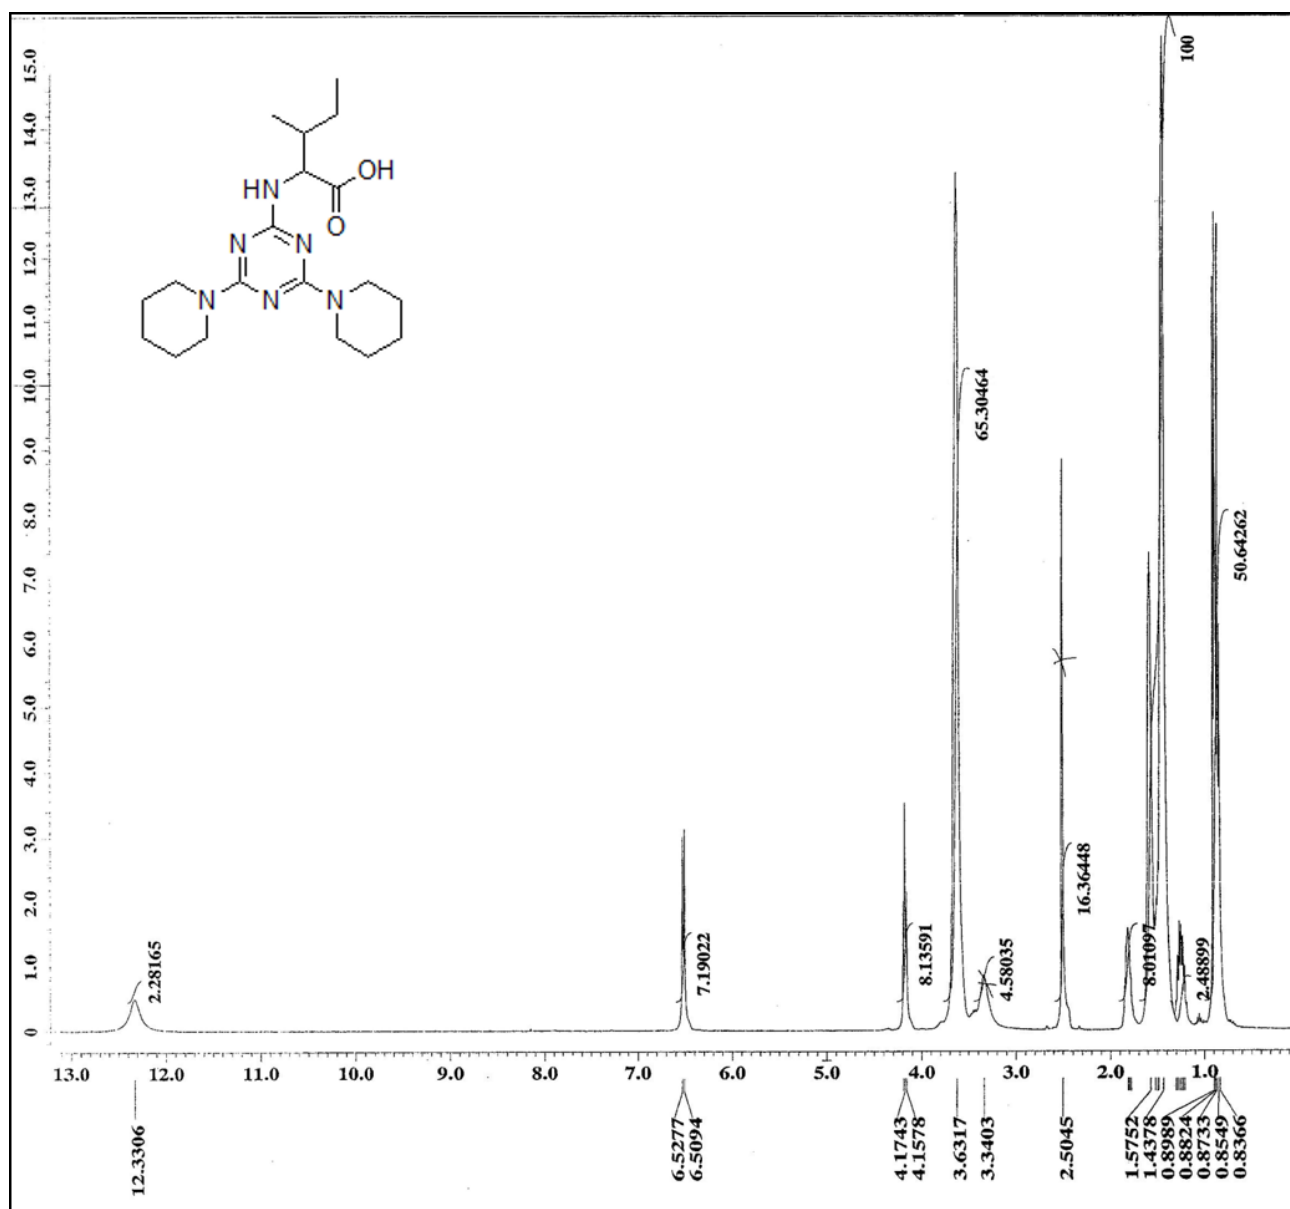

**Figure S26.** <sup>1</sup>H-NMR (DMSO-*d*<sub>6</sub>) spectra of 2-(4,6-di(piperidin-1-yl)-1,3,5-triazin-2-ylamino)-3-methylpentanoic acid **21**.

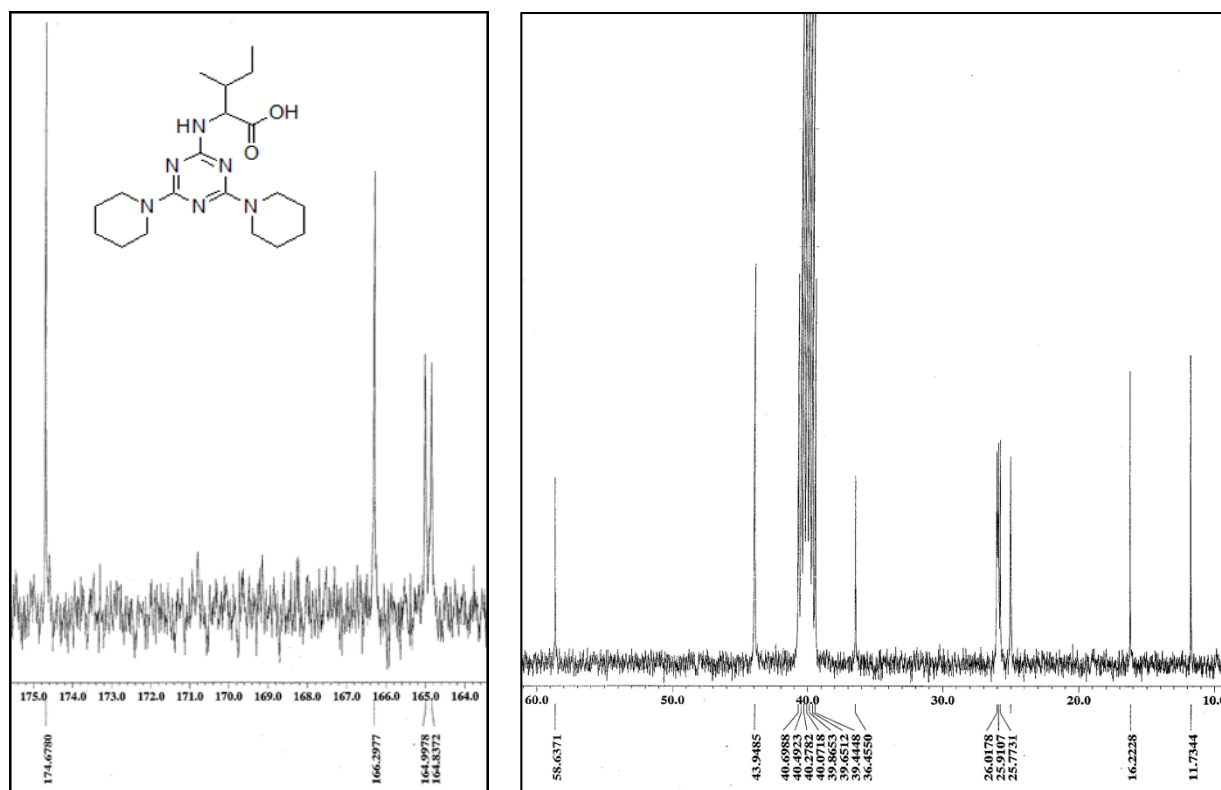

**Figure S27.** <sup>13</sup>C-NMR (DMSO-*d*<sub>6</sub>) spectra of 2-(4,6-di(piperidin-1-yl)-1,3,5-triazin-2-ylamino)-3-methylpentanoic acid **21**.

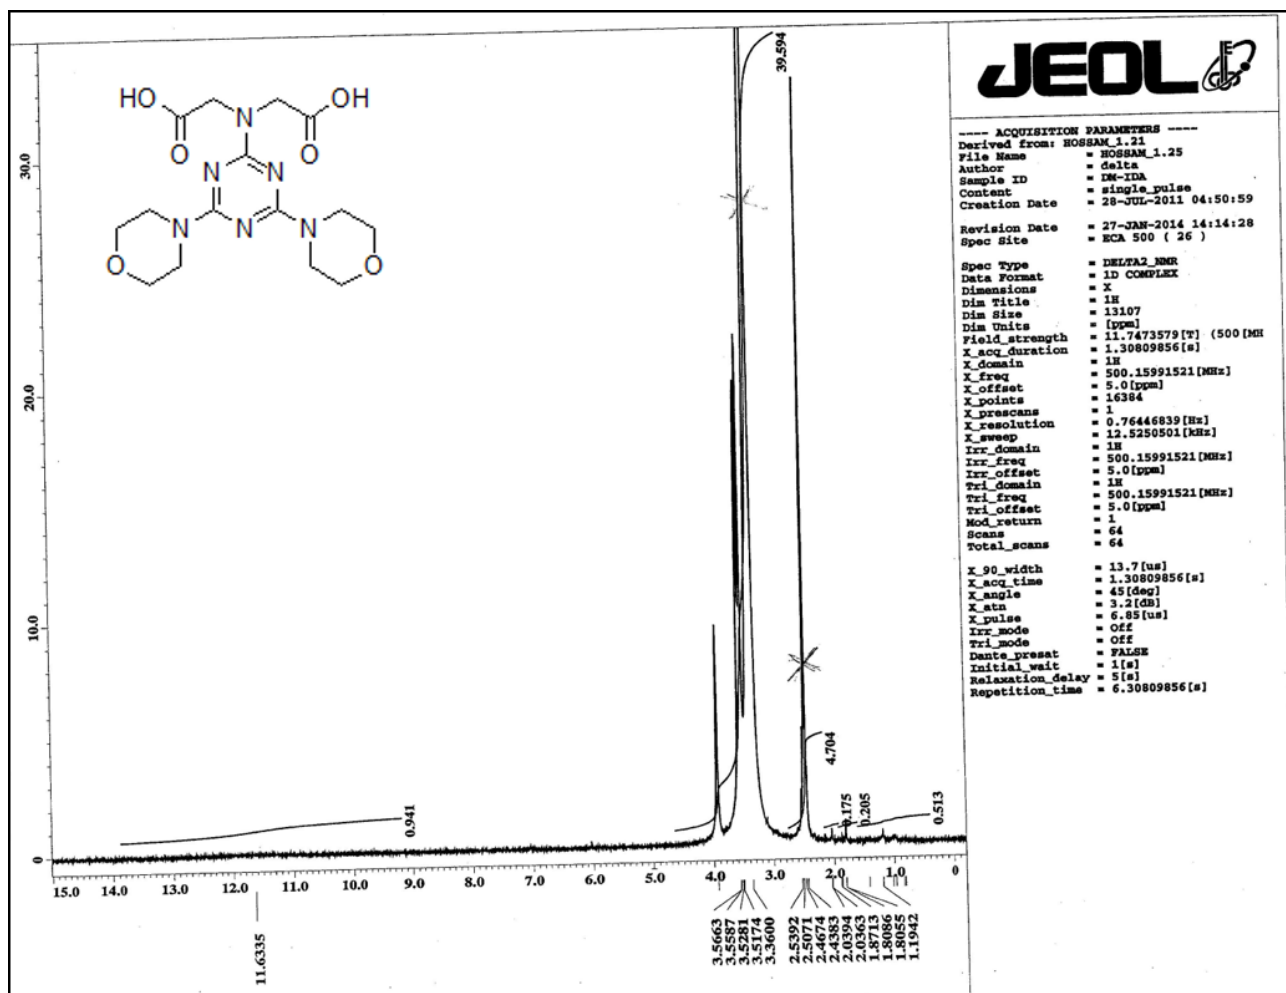

**Figure S28.**  $^1\text{H}$ -NMR (500 MHz,  $\text{DMSO}-d_6$ ) spectrum of *N*-(4,6-dimorpholino-1,3,5-triazin-2-yl)iminodiacetic acid **22**.

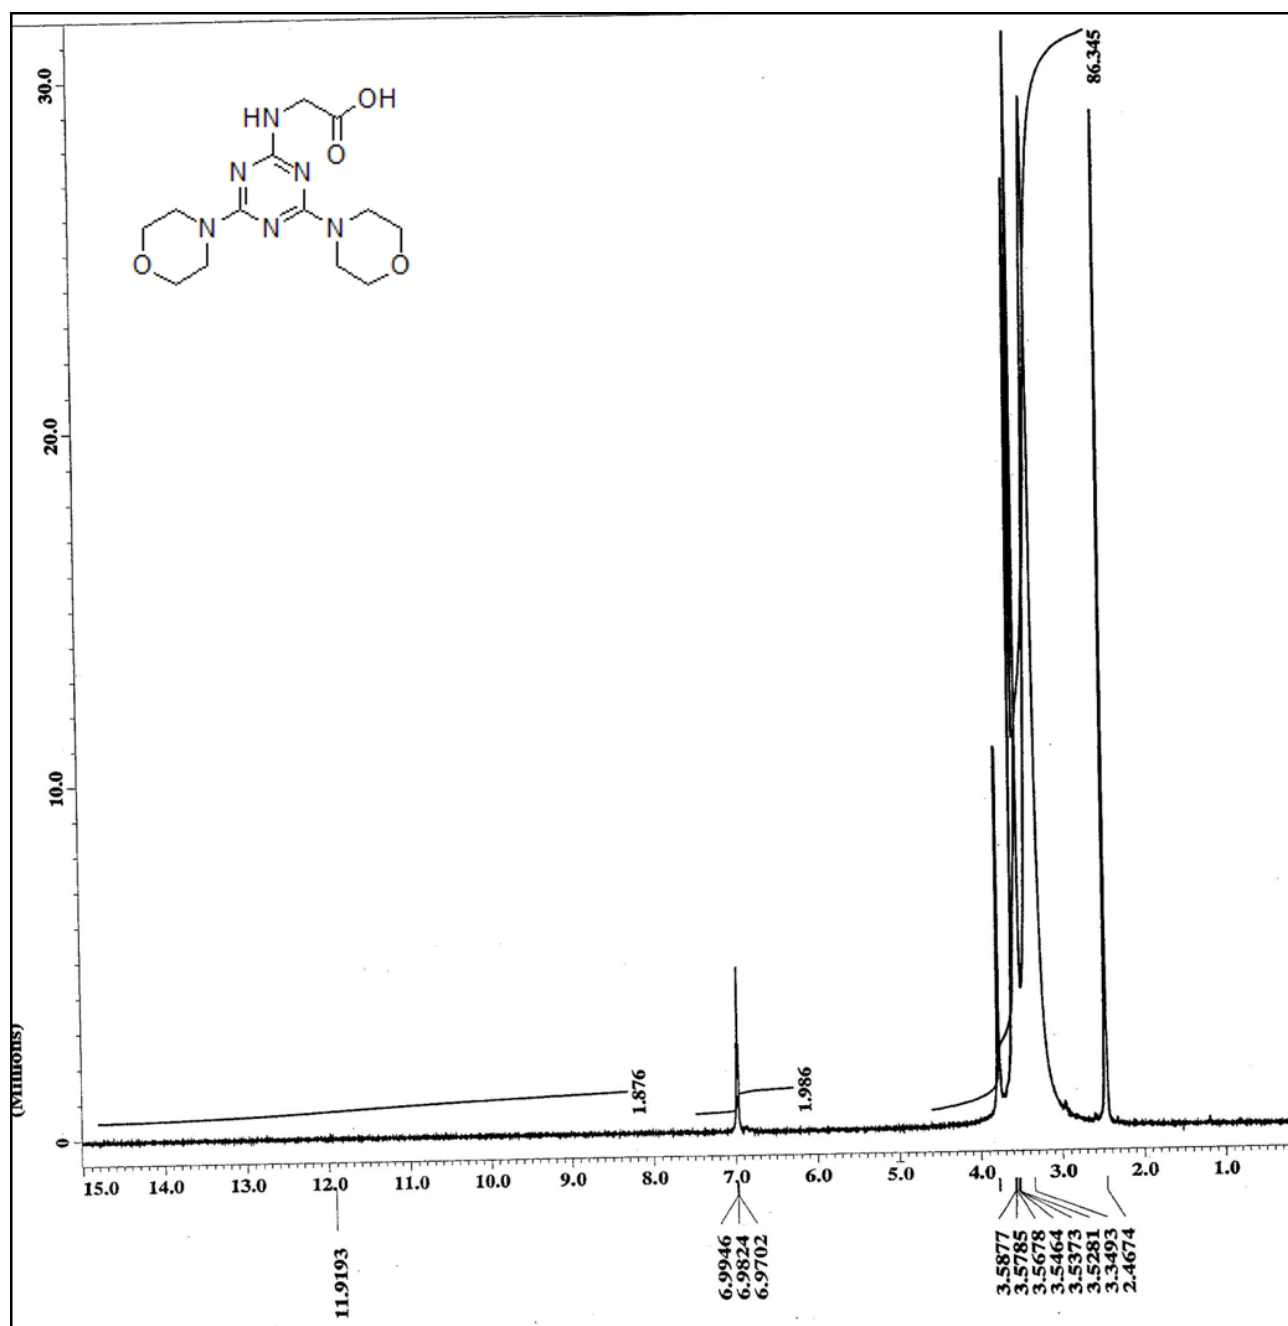

**Figure S29.** <sup>1</sup>H-NMR (DMSO-*d*<sub>6</sub>) spectra of 2-(4,6-dimorpholino-1,3,5-triazin-2-ylamino)acetic acid **23**.

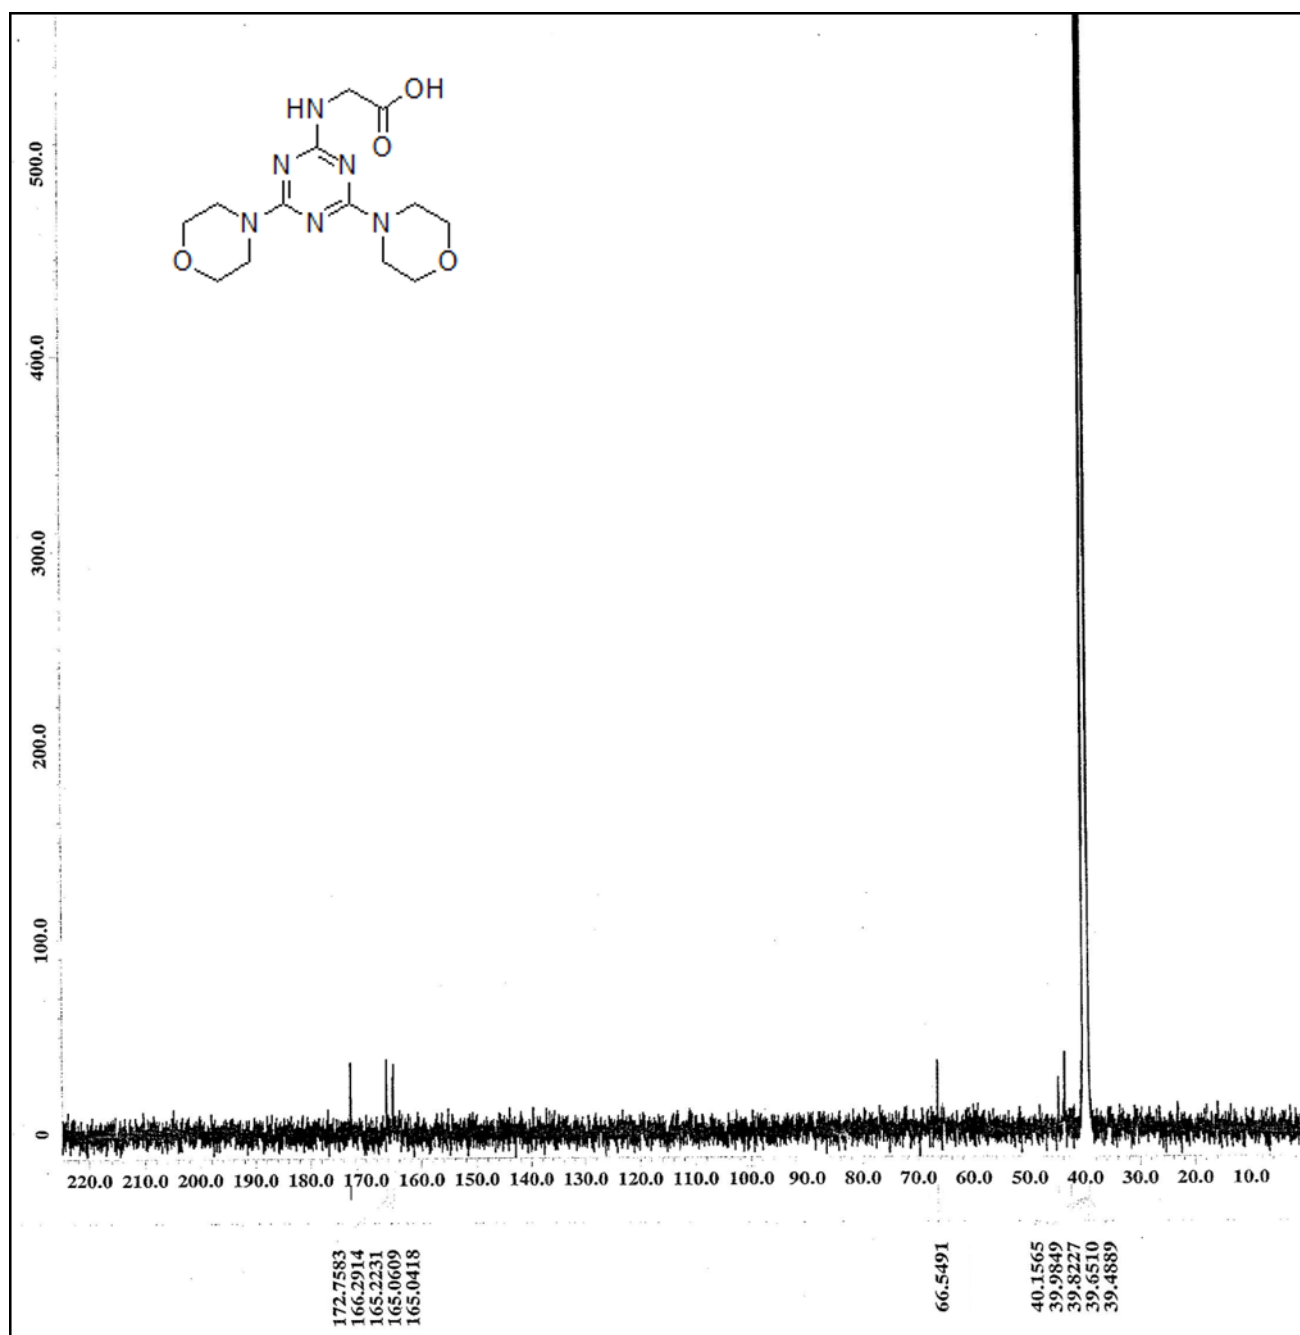

**Figure S20.** <sup>13</sup>C-NMR (DMSO-*d*<sub>6</sub>) spectra of 2-(4,6-dimorpholino-1,3,5-triazin-2-ylamino) acetic acid **23**.

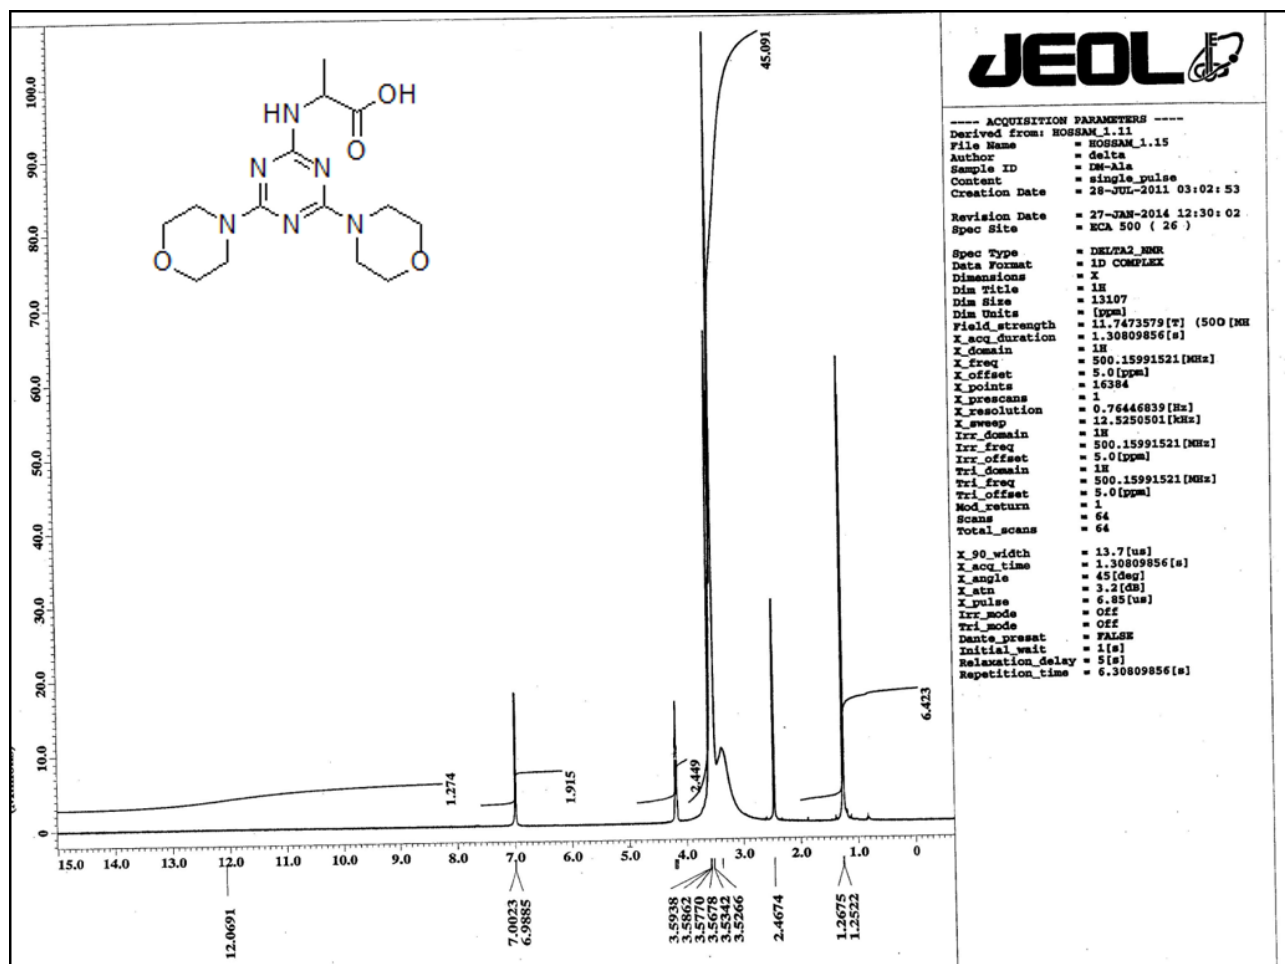

**Figure S31.**  $^1\text{H}$ -NMR (500 MHz,  $\text{DMSO}-d_6$ ) spectrum of 2-(4,6-dimorpholino-1,3,5-triazin-2-ylamino)propanoic acid **24**.

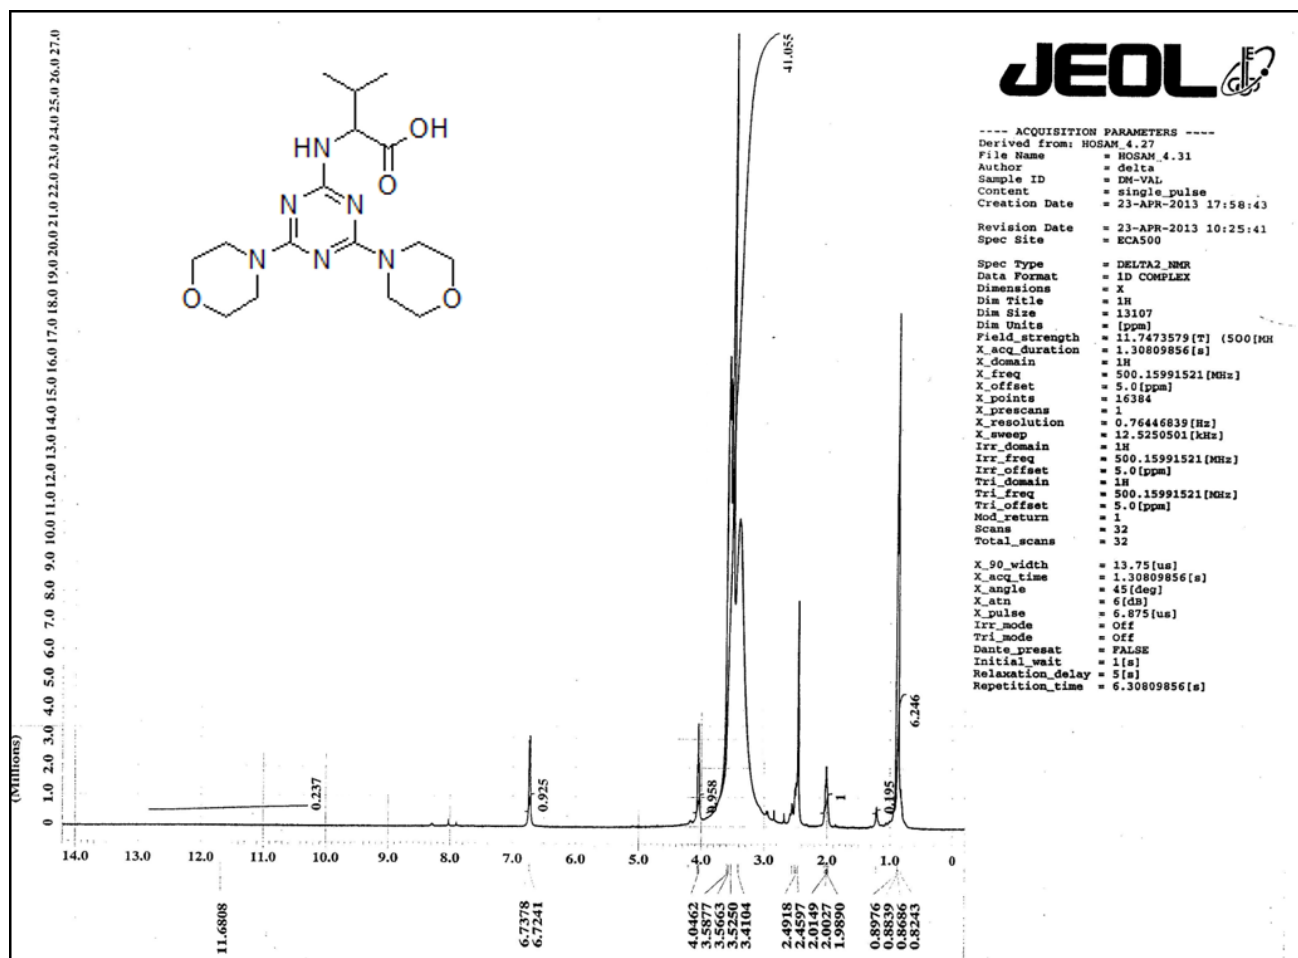

**Figure S32.**  $^1\text{H}$ -NMR (500 MHz,  $\text{DMSO}-d_6$ ) spectrum of 2-(4,6-dimorpholino-1,3,5-triazin-2-ylamino)-3-methylbutanoic acid **25**.



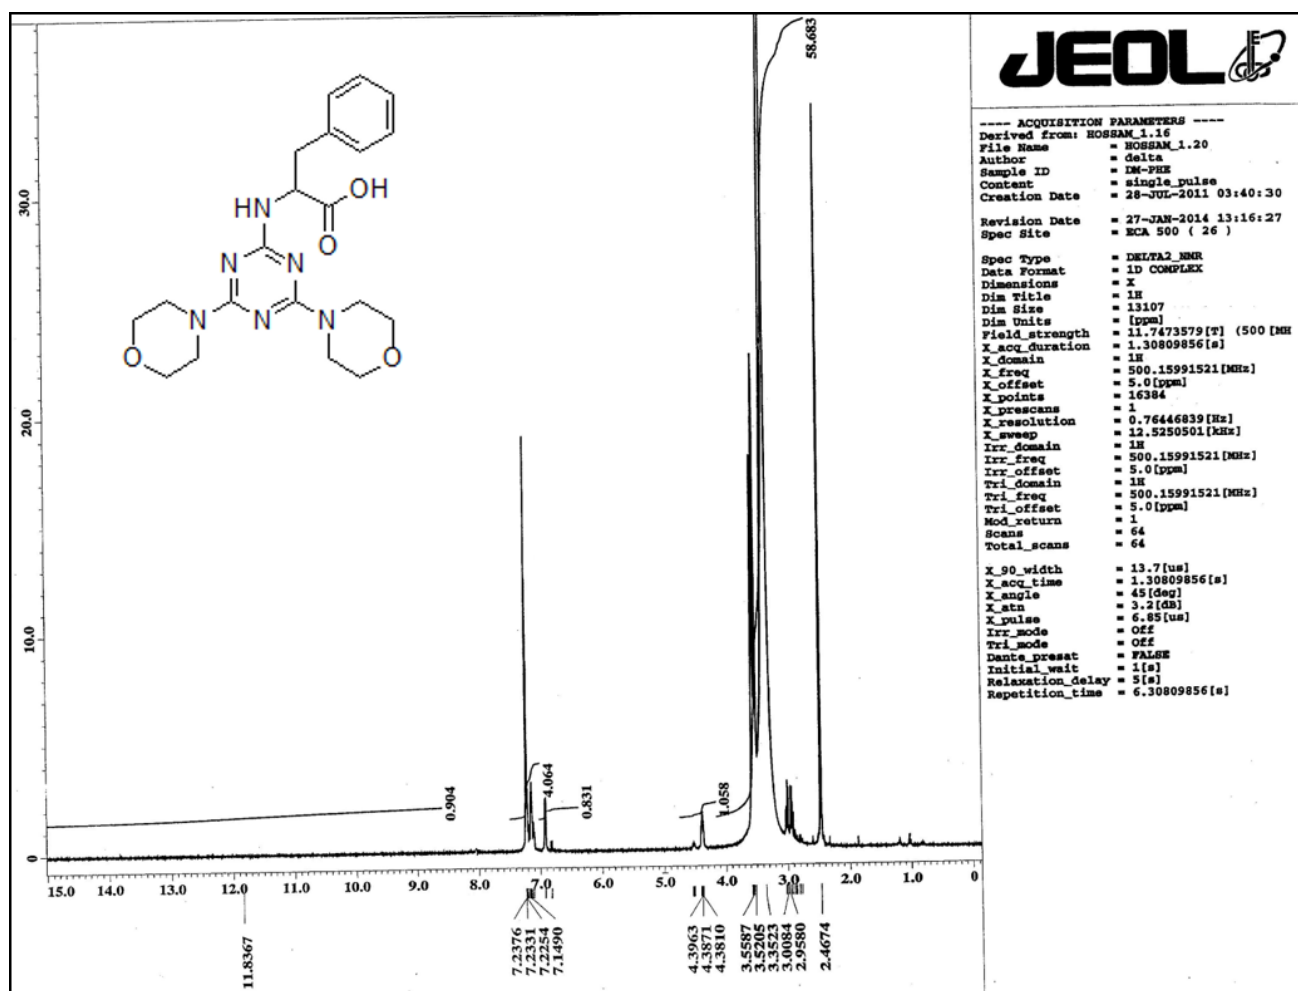

**Figure S33.**  $^1\text{H}$ -NMR (500 MHz,  $\text{DMSO}-d_6$ ) spectrum of 2-(4,6-dimorpholino-1,3,5-triazin-2-ylamino)-3-phenylpropanoic acid **26**.

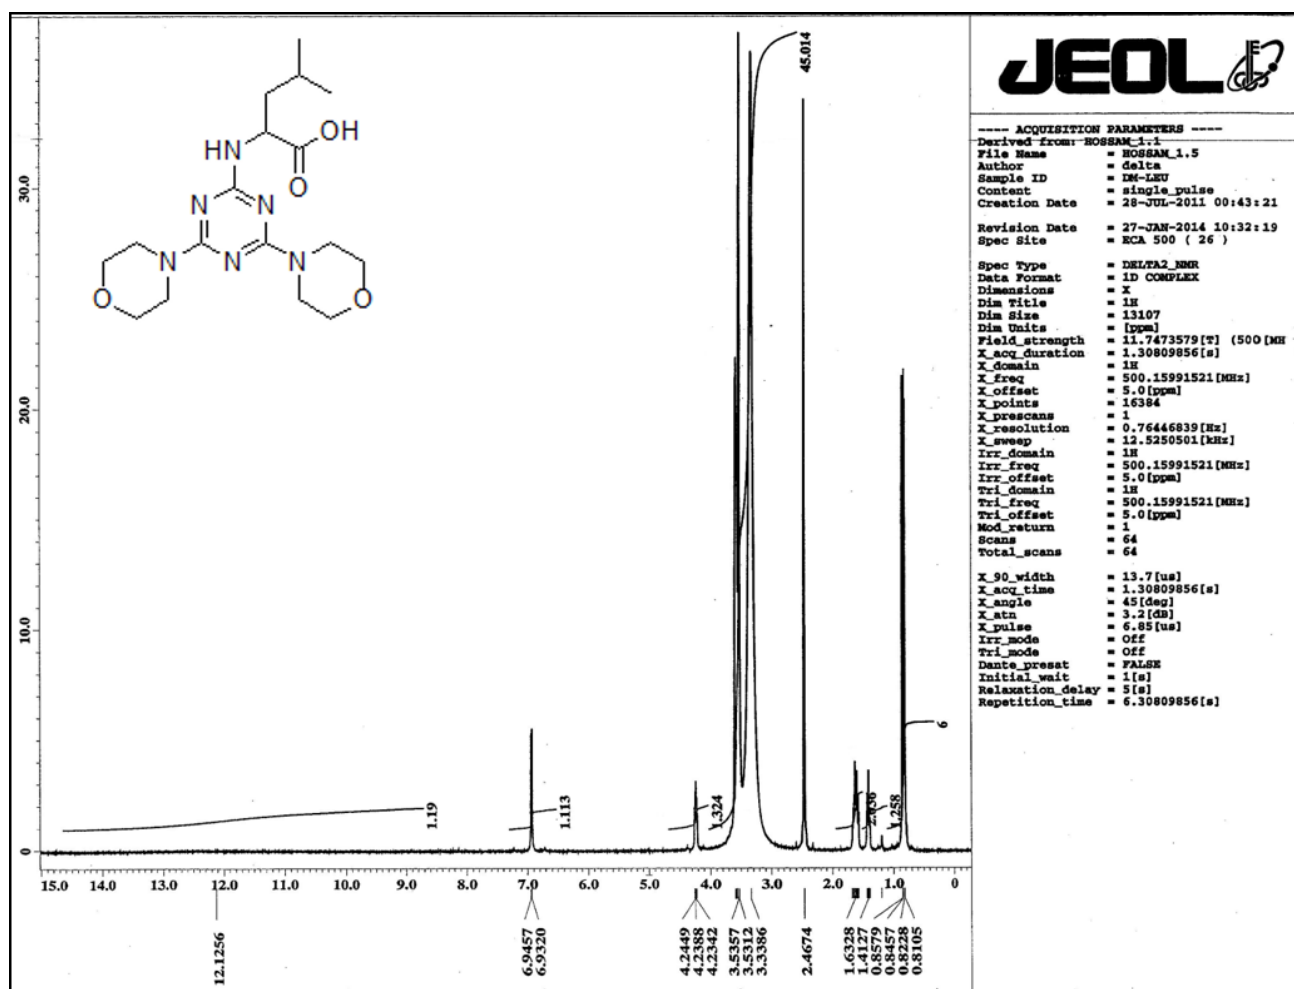

**Figure S34.**  $^1\text{H}$ -NMR (500 MHz,  $\text{DMSO}-d_6$ ) spectrum of 2-(4,6-dimorpholino-1,3,5-triazin-2-ylamino)-4-methylpentanoic acid **27**.

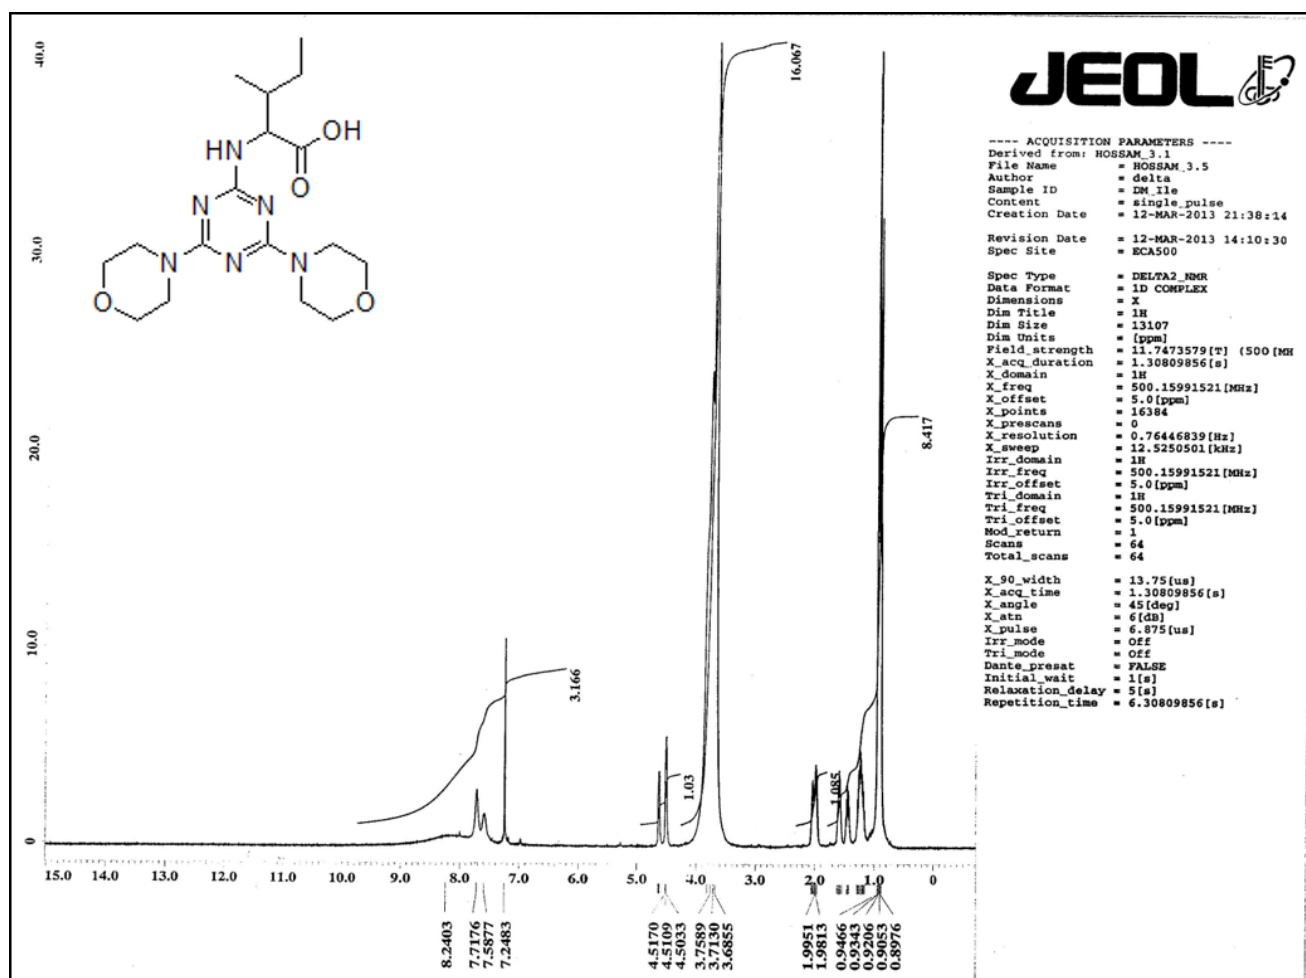

**Figure S35.**  $^1\text{H}$ -NMR (500 MHz,  $\text{CDCl}_3$ ) spectrum of 2-(4,6-dimorpholino-1,3,5-triazin-2-ylamino)-3-methylpentanoic acid **28**.

### Preliminary Biological Tests

The newly synthesized compounds **3–9** and **15–28** were tested to determine their activity toward MAO-A and MAO-B selectivity in the presence of the specific substrate, serotonin or benzylamine (100  $\mu\text{M}$ ), respectively. Bovine brain mitochondria were isolated according to Basford [1]. The activities of MAO-A and MAO-B were determined using a fluorimetric method described by Matsumoto *et al.* [2]. The mitochondrial fractions were incubated at 38  $^\circ\text{C}$  for 30 min with the specific inhibitor of one of MAO isoforms, L-deprenyl (10.5  $\mu\text{M}$ ) to determine MAO-A activity or clorgyline (10.5  $\mu\text{M}$ ) to determine MAO-B activity. The activity of MAO-A or MAO-B was determined using the corresponding mitochondrial fraction previously treated and containing one active enzyme, incubation mixture contained 0.1 mL phosphate buffer (0.25 M, pH 7.4), mitochondrial suspension (6 mg/L, the specific substrate for MAO-A or MAO-B (0.1  $\mu\text{M}$ ) and test compounds at five different concentrations ranging from 0.5 nM to 0.1 mM (0, 0.5 nM, 5 nM, 5  $\mu\text{M}$ , 50  $\mu\text{M}$  and 100  $\mu\text{M}$ ) were dissolved in propylene glycol. The mixture was incubated in a shaking water-bath at 37  $^\circ\text{C}$  for 60 min. The reaction was quenched by adding perchloric acid. The samples were centrifuged at 10,000 $\times$  g for 5 min and the supernatant was completed to 2.7 mL using 1 N NaOH and measured with a Perkin-Elmer Lf 45 Spectrofluorimeter. The  $\text{IC}_{50}$  value was calculated and analyzed using the four-parameter logistic function in Sigma Plot software (SigmaPlot 12.3, Systat

Software. Inc., Richmond, CA, USA). Protein concentration was determined according to a previously reported method [3]. The MAO-A and MAO-B results are expressed as IC<sub>50</sub> (Table 1). Propylene glycol was used as negative control and did not show any effect on the enzyme activity.

**Table 1.** Effect of 2,4-disubstituted-1,3,5-triazine-based amino acid derivatives on MAO-A and MAO-B activity.

| Compound          | IC <sub>50</sub> (M)          |                               | Selectivity Index (SI) <sup>a</sup> |
|-------------------|-------------------------------|-------------------------------|-------------------------------------|
|                   | MAO-A                         | MAO-B                         |                                     |
| <b>3</b>          | $5.8 \times 10^{-8} \pm 0.13$ | $3.9 \times 10^{-4} \pm 0.28$ | 6724                                |
| <b>4</b>          | $8.4 \times 10^{-8} \pm 0.12$ | $9.8 \times 10^{-4} \pm 0.32$ | 11667                               |
| <b>5</b>          | $6.4 \times 10^{-8} \pm 0.14$ | $9.4 \times 10^{-4} \pm 0.18$ | 14688                               |
| <b>6</b>          | $5.1 \times 10^{-9} \pm 0.48$ | $4.4 \times 10^{-4} \pm 0.22$ | 68275                               |
| <b>7</b>          | $3.1 \times 10^{-9} \pm 0.24$ | $7.4 \times 10^{-4} \pm 0.28$ | 238710                              |
| <b>8</b>          | $6.7 \times 10^{-8} \pm 0.44$ | $5.8 \times 10^{-4} \pm 0.12$ | 8657                                |
| <b>9</b>          | $7.4 \times 10^{-8} \pm 0.22$ | $4.8 \times 10^{-4} \pm 0.11$ | 6486                                |
| <b>15</b>         | $8.8 \times 10^{-8} \pm 0.28$ | $7.4 \times 10^{-4} \pm 0.24$ | 8409                                |
| <b>16</b>         | $8.7 \times 10^{-8} \pm 0.13$ | $7.4 \times 10^{-4} \pm 0.34$ | 8506                                |
| <b>17</b>         | $6.1 \times 10^{-8} \pm 0.26$ | $4.4 \times 10^{-4} \pm 0.46$ | 7213                                |
| <b>18</b>         | $3.2 \times 10^{-9} \pm 0.22$ | $5.4 \times 10^{-4} \pm 0.16$ | 168750                              |
| <b>19</b>         | $7.8 \times 10^{-9} \pm 0.28$ | $5.5 \times 10^{-4} \pm 0.18$ | 70513                               |
| <b>20</b>         | $3.2 \times 10^{-8} \pm 0.22$ | $9.8 \times 10^{-4} \pm 0.14$ | 30625                               |
| <b>21</b>         | $2.8 \times 10^{-8} \pm 0.18$ | $8.2 \times 10^{-4} \pm 0.27$ | 29286                               |
| <b>22</b>         | $7.2 \times 10^{-8} \pm 0.36$ | $6.1 \times 10^{-4} \pm 0.32$ | 8472                                |
| <b>23</b>         | $5.8 \times 10^{-8} \pm 0.38$ | $4.8 \times 10^{-4} \pm 0.28$ | 8276                                |
| <b>24</b>         | $6.4 \times 10^{-8} \pm 0.14$ | $5.7 \times 10^{-4} \pm 0.10$ | 8906                                |
| <b>25</b>         | $3.5 \times 10^{-9} \pm 0.28$ | $8.6 \times 10^{-4} \pm 0.26$ | 245714                              |
| <b>26</b>         | $4.2 \times 10^{-8} \pm 0.32$ | $7.8 \times 10^{-4} \pm 0.28$ | 18571                               |
| <b>27</b>         | $2.9 \times 10^{-8} \pm 0.12$ | $8.8 \times 10^{-4} \pm 0.14$ | 30345                               |
| <b>28</b>         | $3.2 \times 10^{-8} \pm 0.16$ | $9.2 \times 10^{-4} \pm 0.22$ | 28750                               |
| <b>Clorgyline</b> | $2.9 \times 10^{-9} \pm 0.12$ | $9.8 \times 10^{-5} \pm 0.16$ | 33793                               |

The results were expressed as mean  $\pm$  S.E.M. Data were analyzed by one-way of variance. Student's test for unpaired observations was used.  $p$ -value  $\leq 0.001$  and was significant. The number of experiments was 6.

<sup>a</sup> SI = MAO-B IC<sub>50</sub>/MAO-A IC<sub>50</sub>.

Oral acute toxicity of the test compounds was studied using male mice (20 g each, Medical Research Institute, Alexandria University) according to previously reported methods [4]. The animals were divided into groups of six mice each. The compounds were given orally, suspended in 1% gum acacia, in doses of 50, 150, 200, 250 mg/kg. The mortality percentage in each group was recorded after 24 h. Additionally, the test compounds were investigated for their parenteral acute toxicity [5] in groups of mice of six animals each. The compounds or their vehicle, propylene glycol (control), were given by intraperitoneal injection in doses of 25, 50, 75, 100, 125 mg/kg. The percentage survival was followed up to 7 days.

## References

1. Basford, R.E. Preparation and properties of brain mitochondria. *Methods Enzymol.* **1967**, *10*, 96–101.
2. Matsumoto, T.; Suzuki, O.; Furuta, T.; Asai, M.; Kurokawa, Y.; Rimura, Y.; Katsumata, Y.; Takahashi, I. A sensitive fluorometric assay for serum monoamine oxidase with kynuramine as substrate. *Clin. Biochem.* **1985**, *18*, 126–129.
3. Bradford, M.M. A rapid and sensitive method for the quantitation of microgram quantities of protein utilizing the principle of protein-dye binding. *Anal. Biochem.* **1976**, *72*, 248–254.
4. Verma, M.; Tripathi, M.; Saxena, A.K.; Shanker, K. Antiinflammatory activity of novel indole derivatives. *Eur. J. Med. Chem.* **1994**, *29*, 941–946.
5. Bekhit, A.A.; Fahmy, H.T.Y. Design and Synthesis of Some Substituted 1H-Pyrazolyl-oxazolidines or 1H-Pyrazolyl-thiazolidines as Anti-inflammatory-Antimicrobial Agents. *Arch. Pharm. Pharm. Med. Chem.* **2003**, *336*, 111–118.
